# Supplementary material for: PARP Inhibition Increases the Response to Chemotherapy in Uveal Melanoma
Source: Cancers (Basel). 2019 May 29;11(6):751. doi: 10.3390/cancers11060751 (PMC6628115; doi:10.3390/cancers11060751)
Supplement: Supplementary file 1 [file cancers-11-00751-s001.pdf]

# Figure S1: Affymetrix-based PARP family gene expression

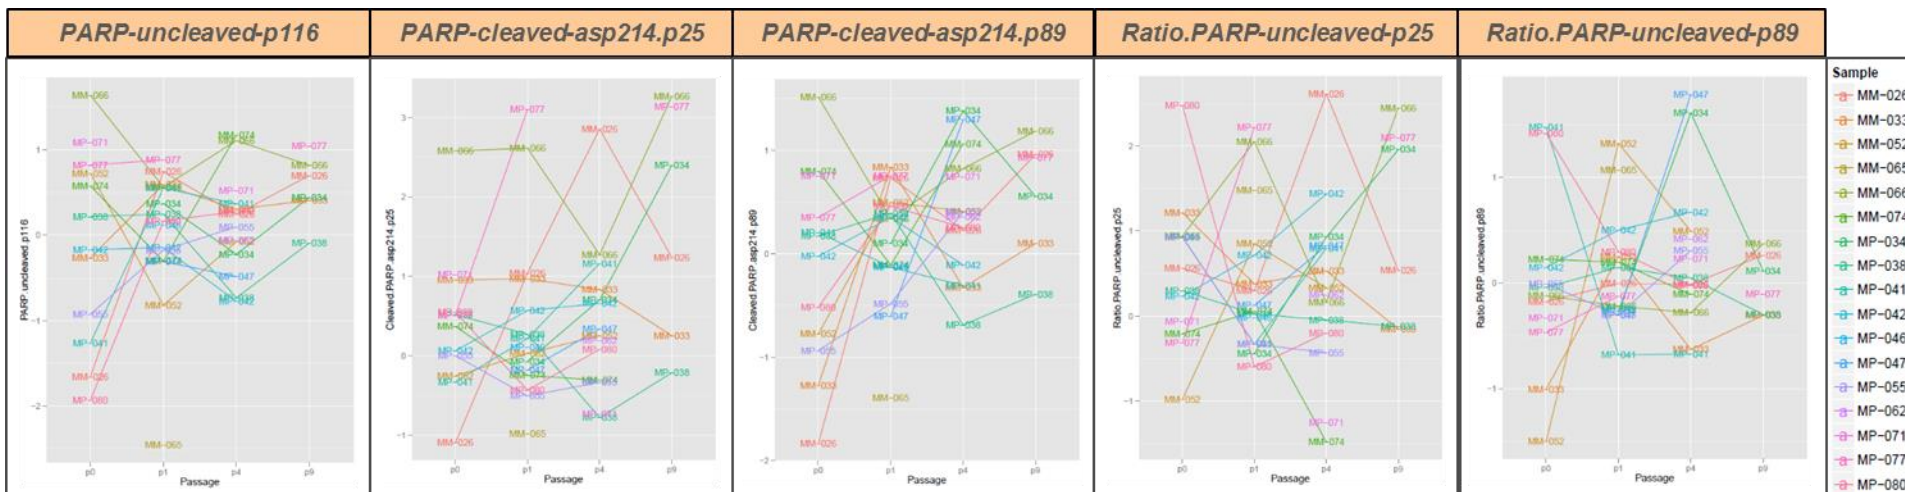

**Figure S2: Affymetrix-based PARP family gene expression**

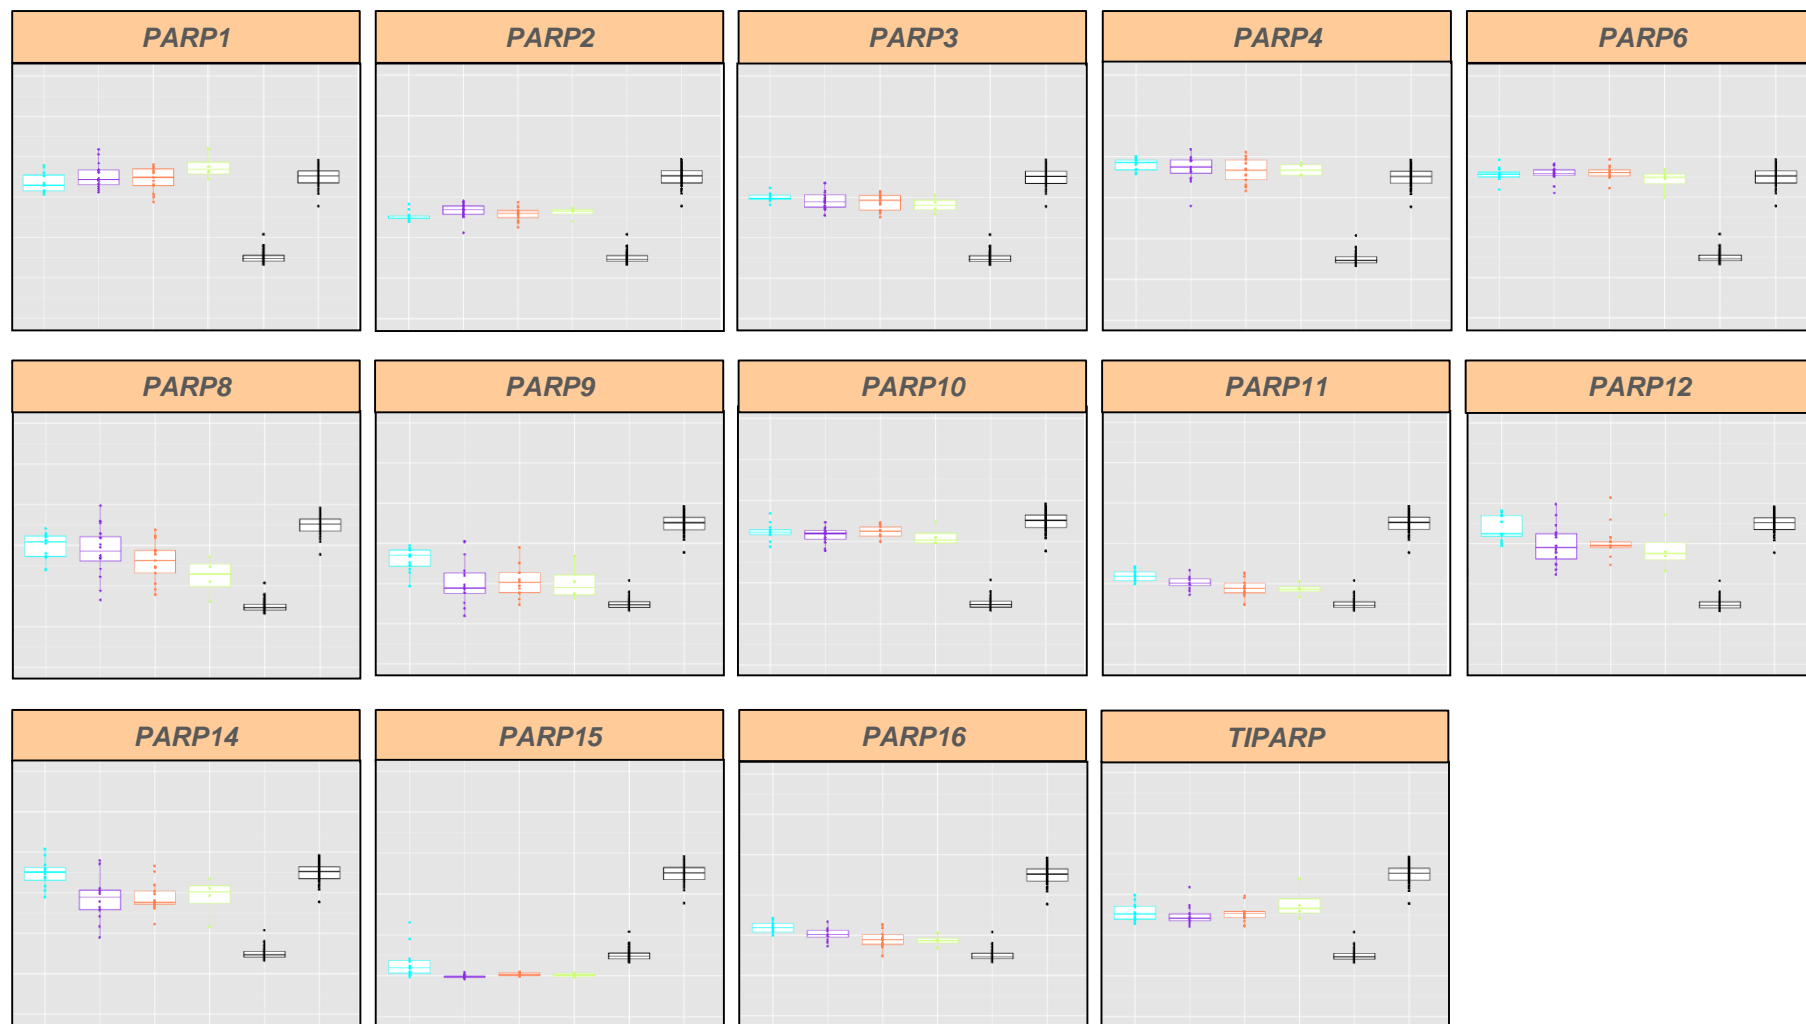

Figure S3: Combination of olaparib and fotemustine

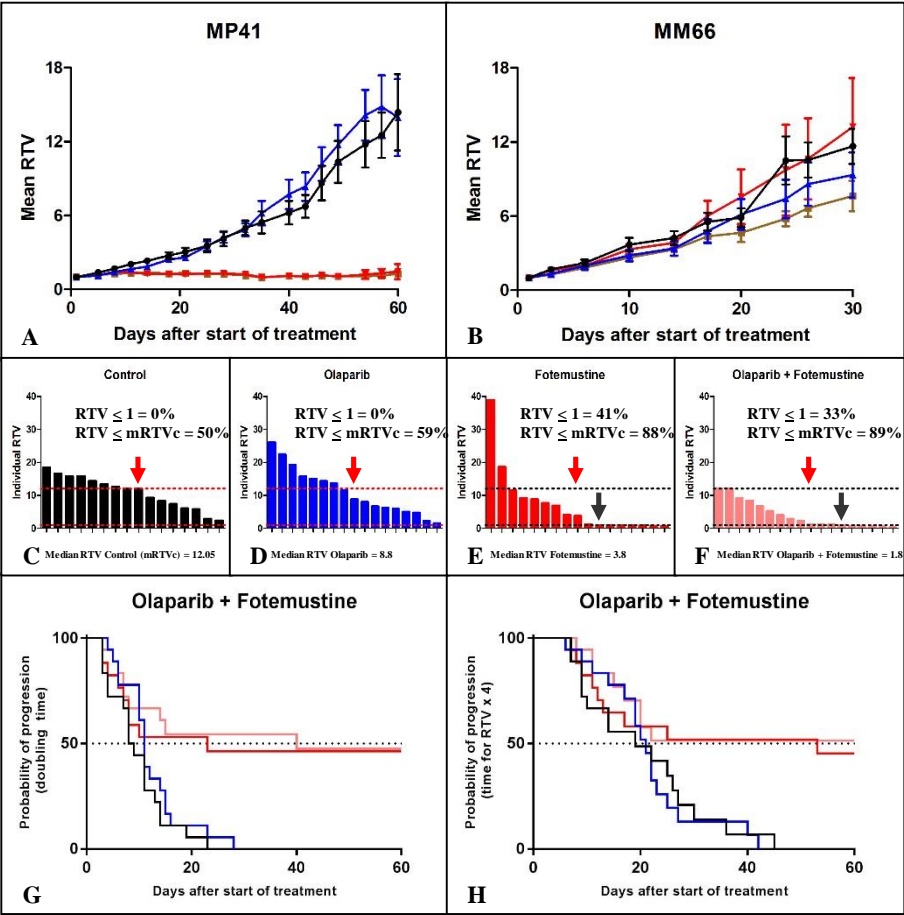

**Figure S4: Combination of olaparib and everolimus**

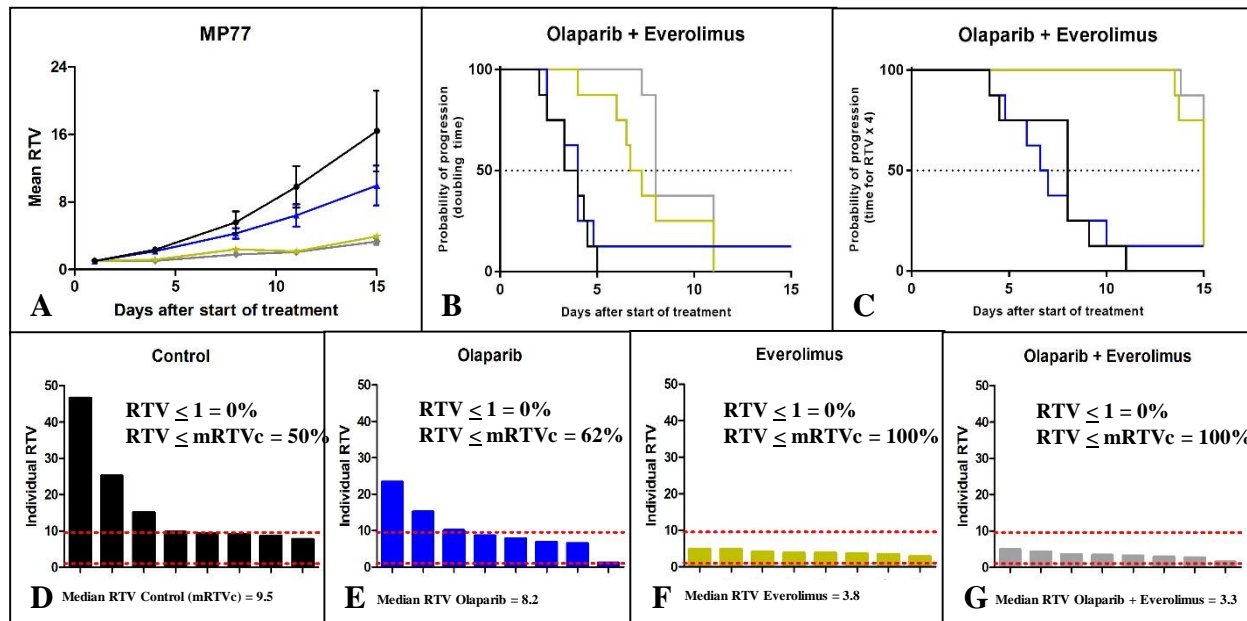

# Figure S5: Combination of olaparib and AEB071

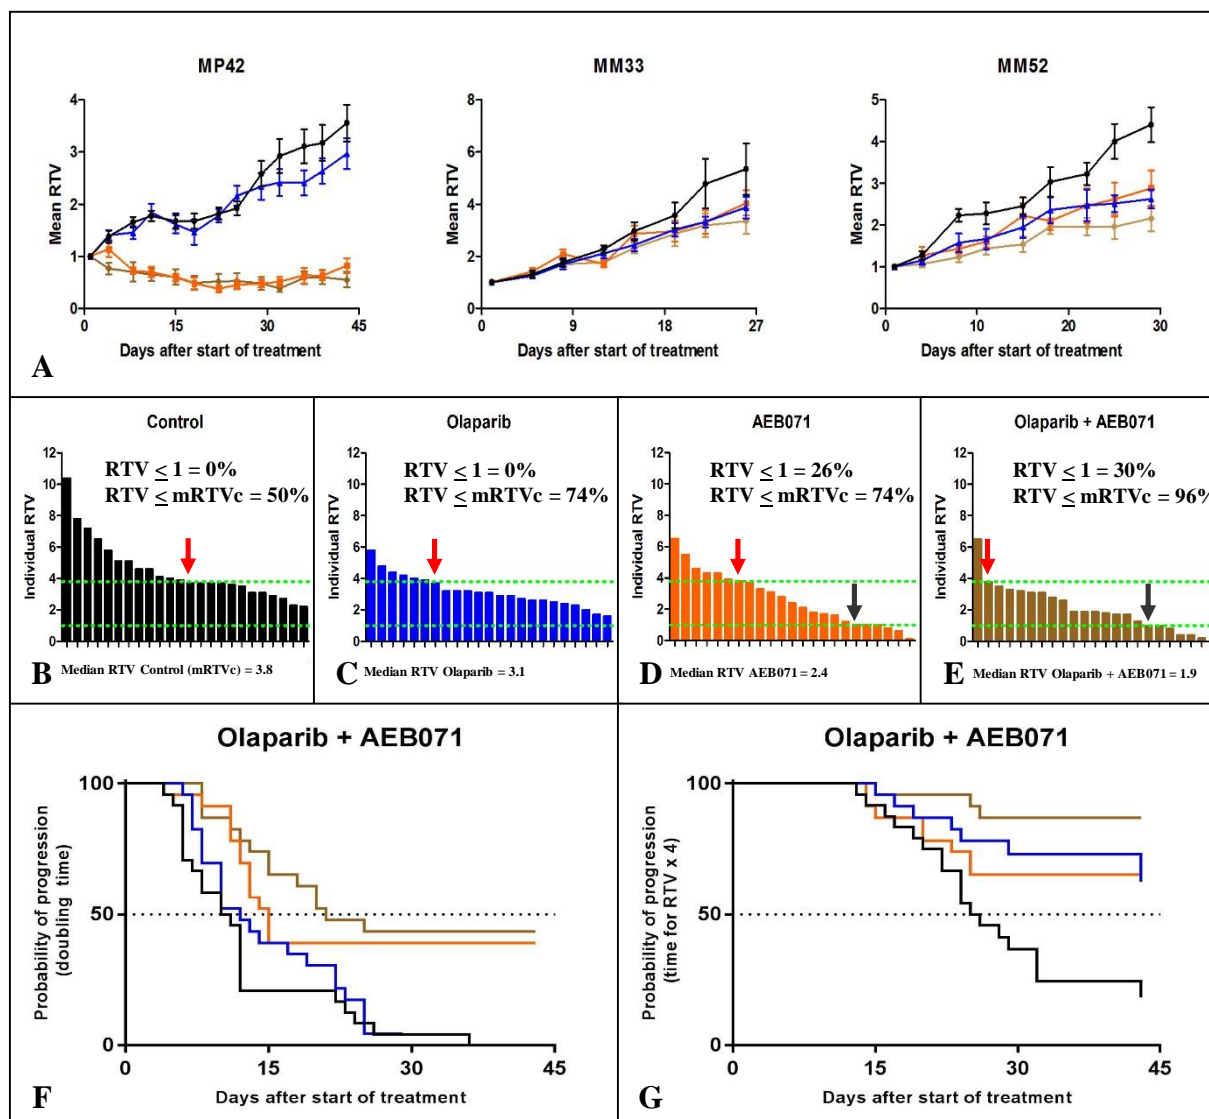

# Figure S6: Combination of olaparib and CGM097

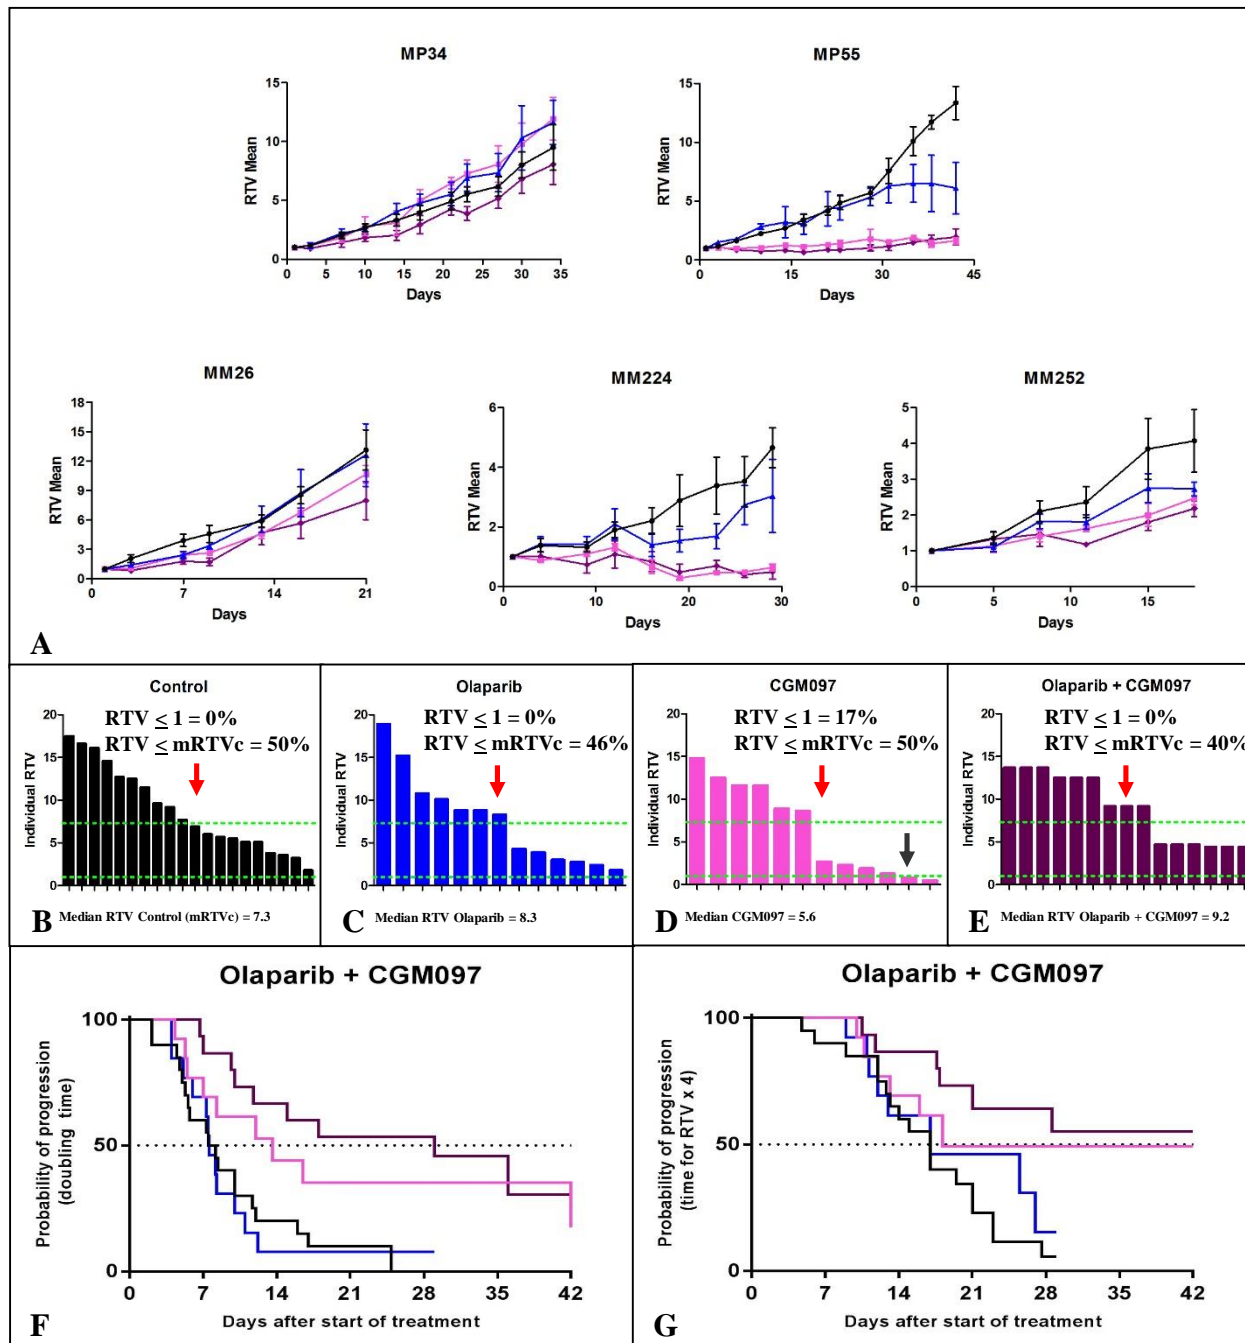

# Figure S7: Combination of olaparib and AZD0156

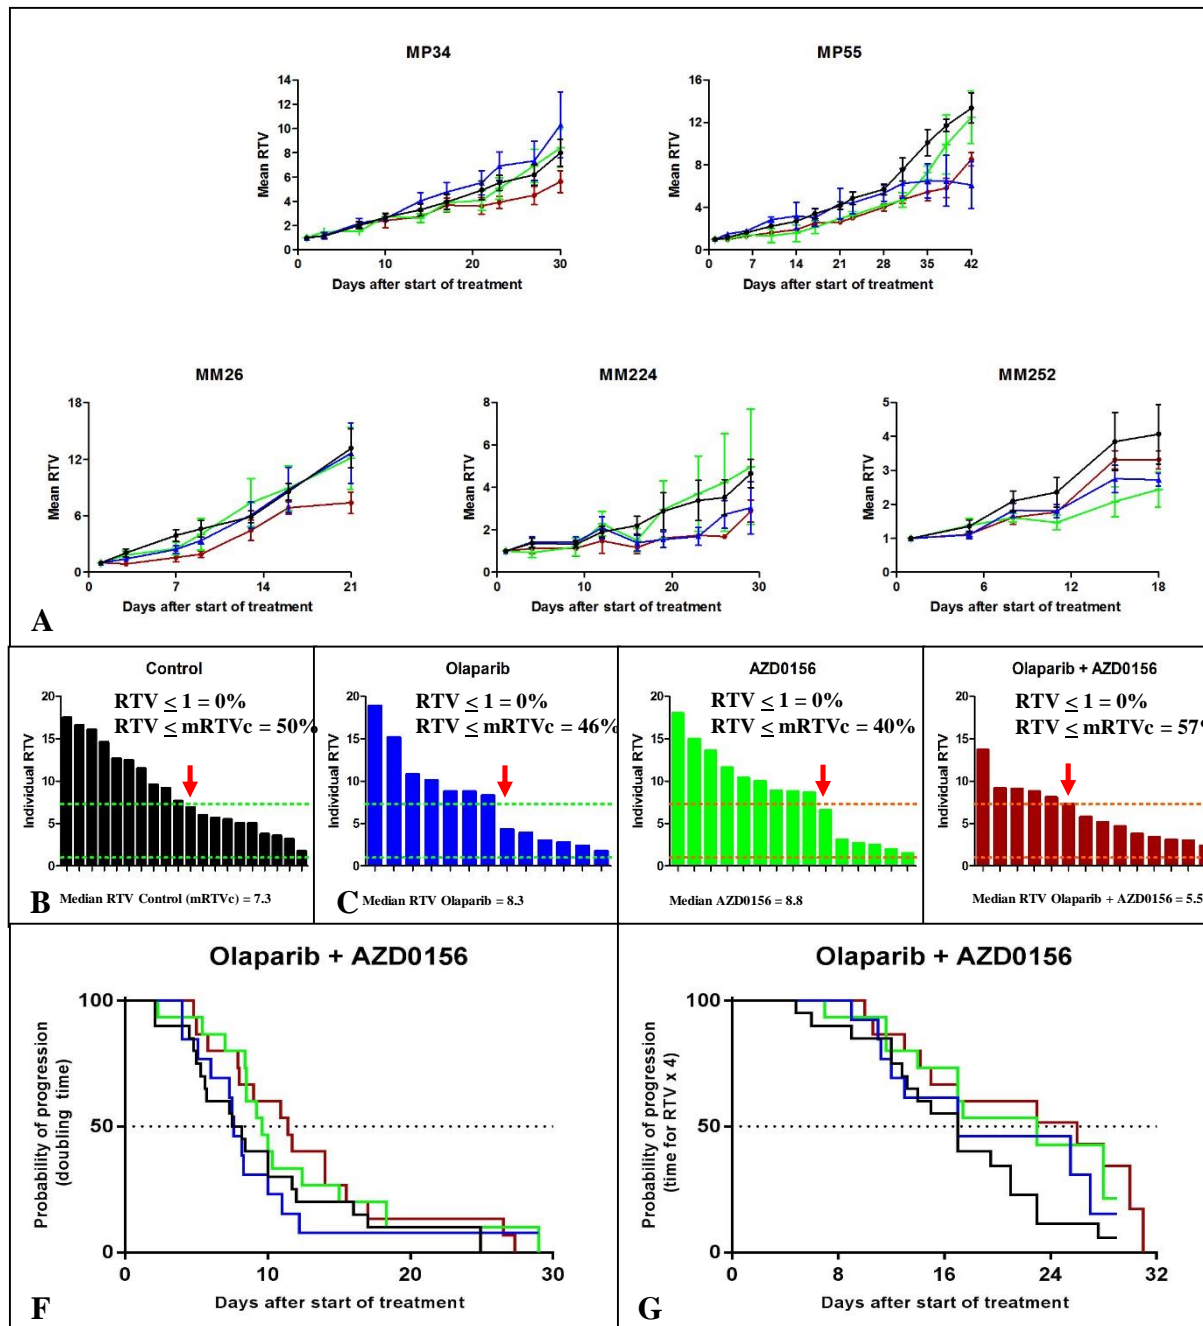

# Figure S8: Combination of olaparib and AZD6738

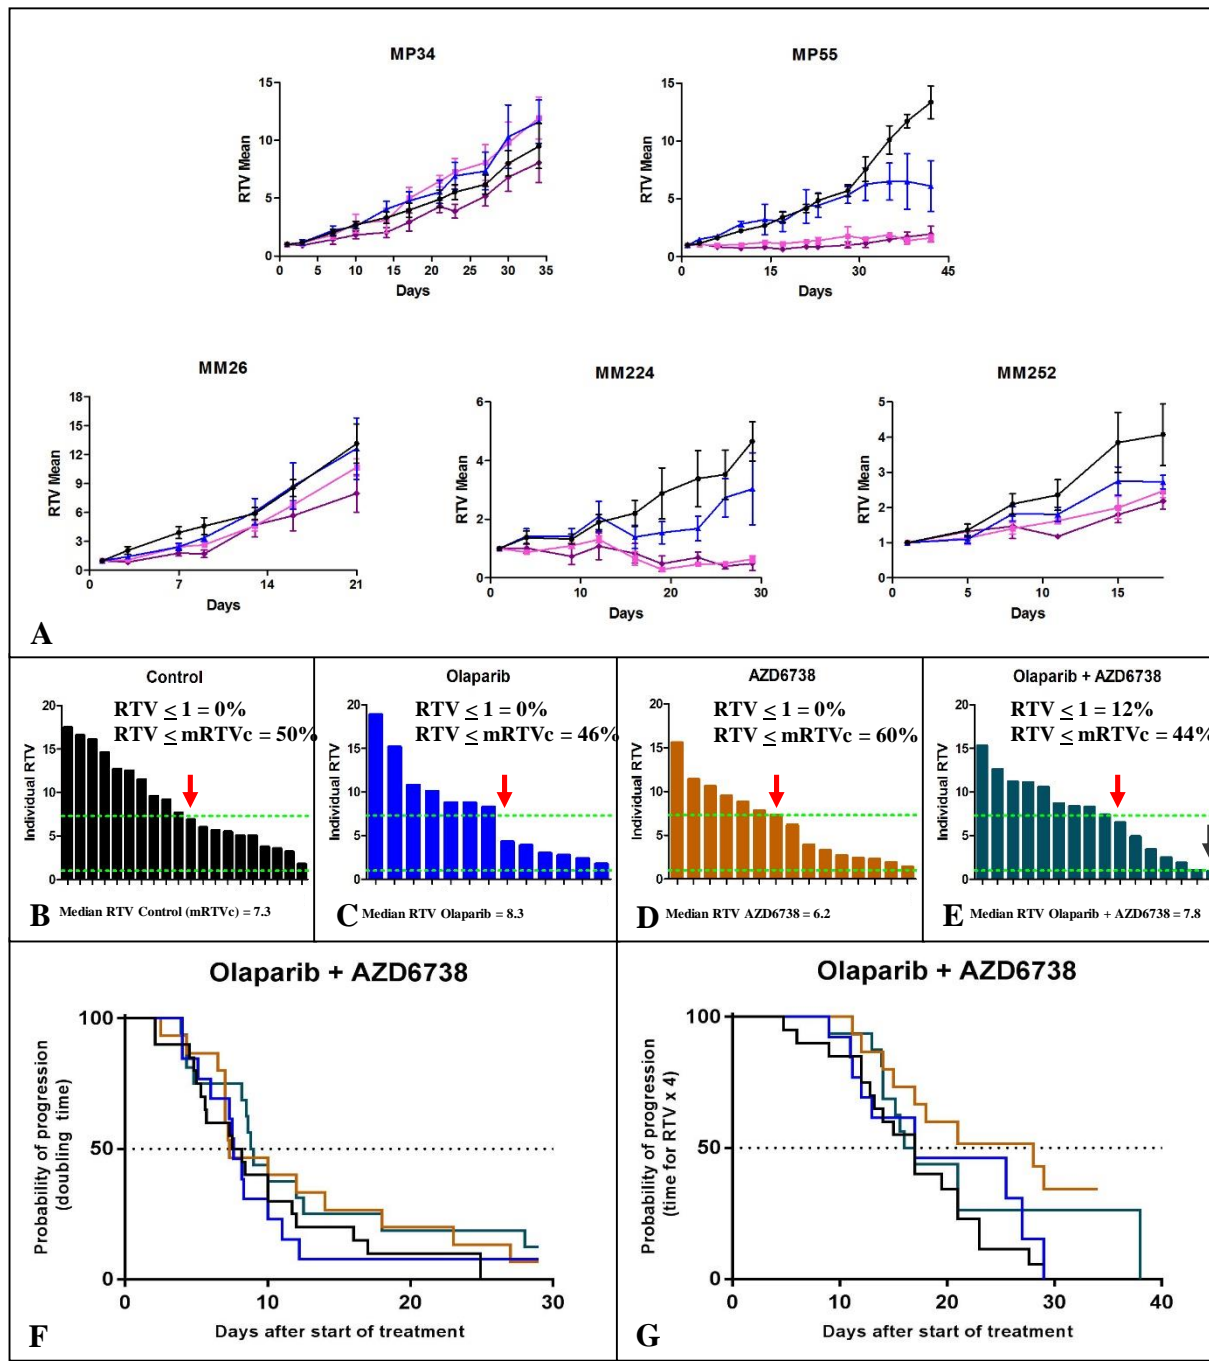

**Figure S9: Significant protein expression between PDXs with additive efficacy (MP55-MP77-MM33) and PDX without additive efficacy (MM52) of the DTIC + olaparib combination ( $p < 0.05$ )**

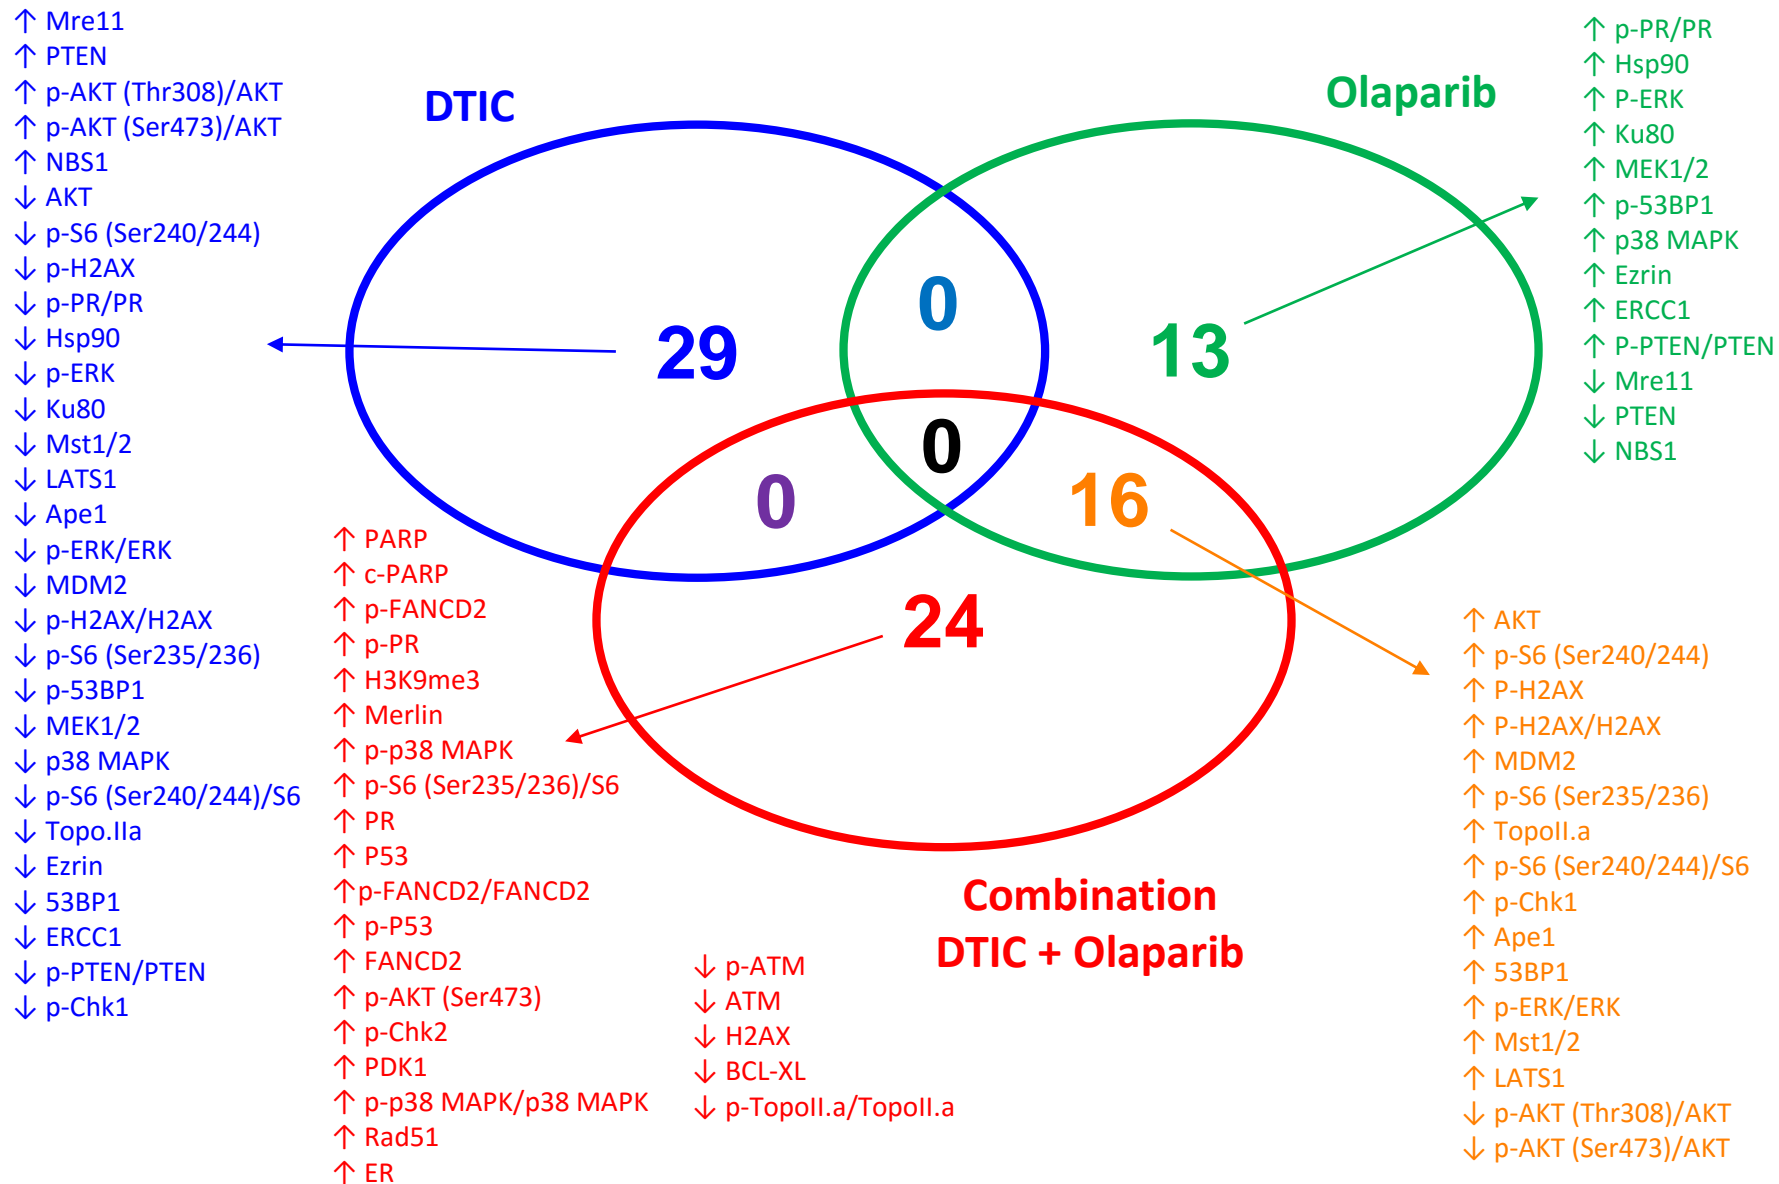

**Figure S10: Significant protein expression between PDXs with additive efficacy (MP55-MP77-MM33) and PDX without additive efficacy (MM52) of the DTIC + olaparib combination**

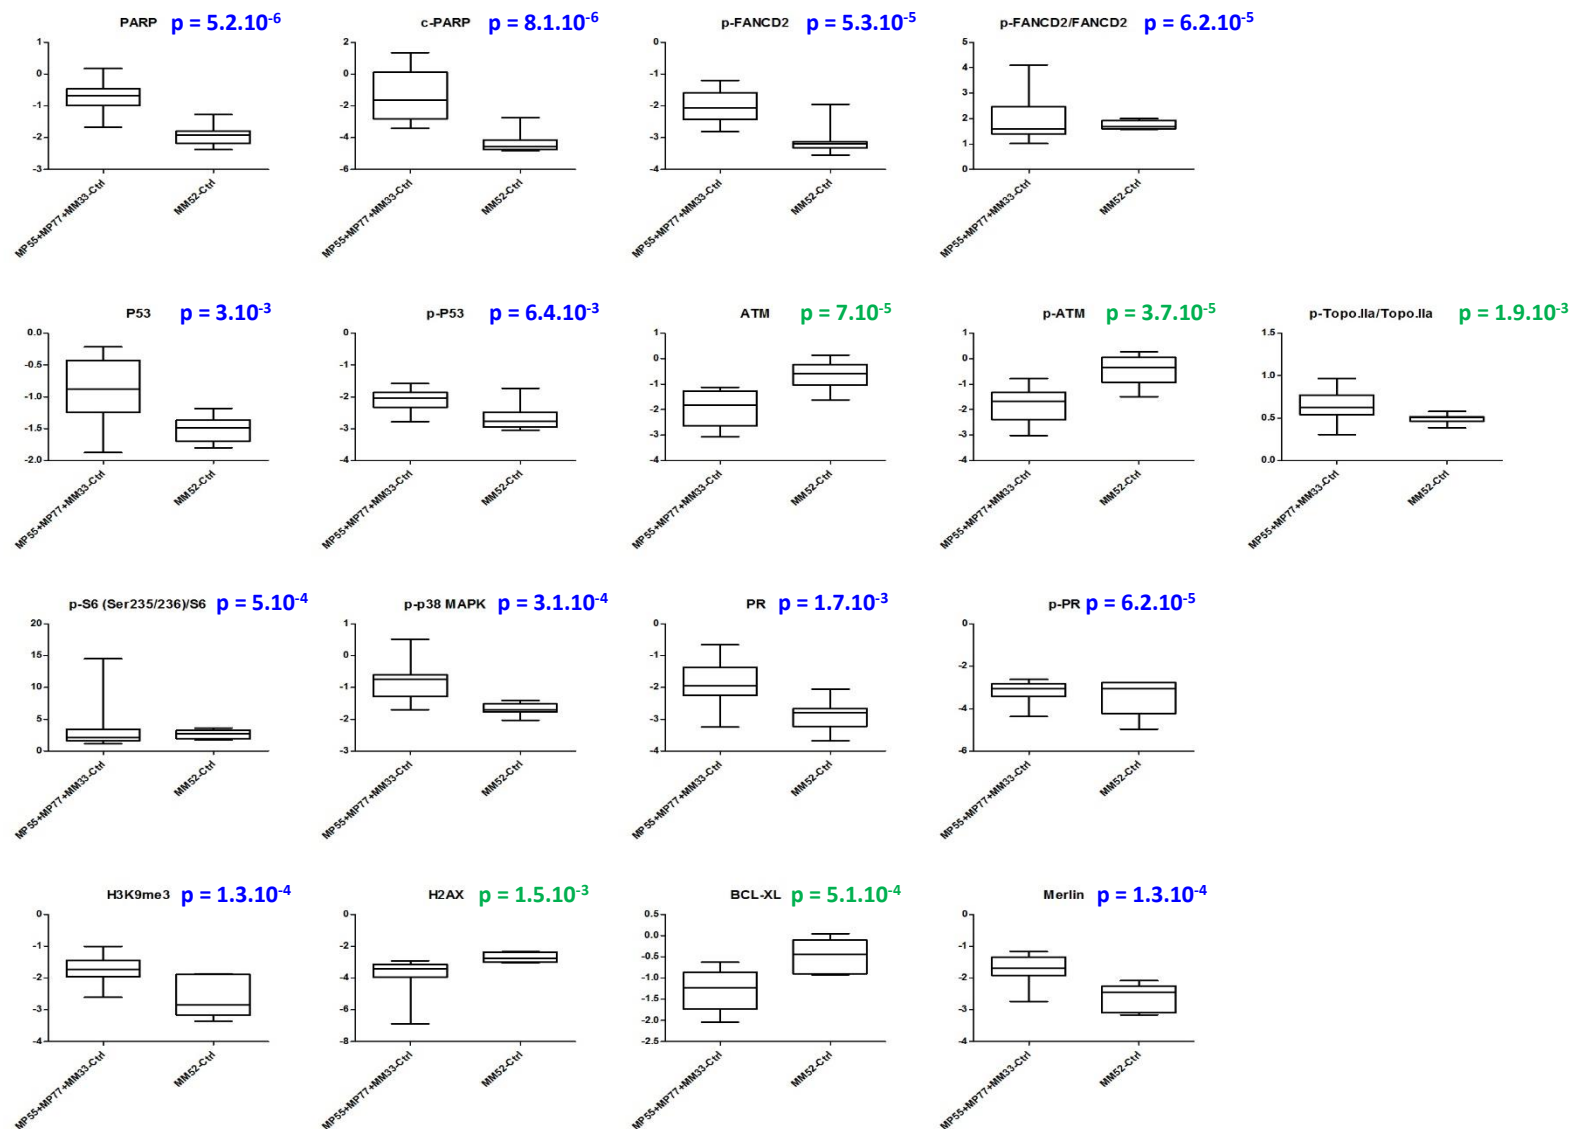

**Figure S11: RPPA-based PARP and c-PARP protein expression**

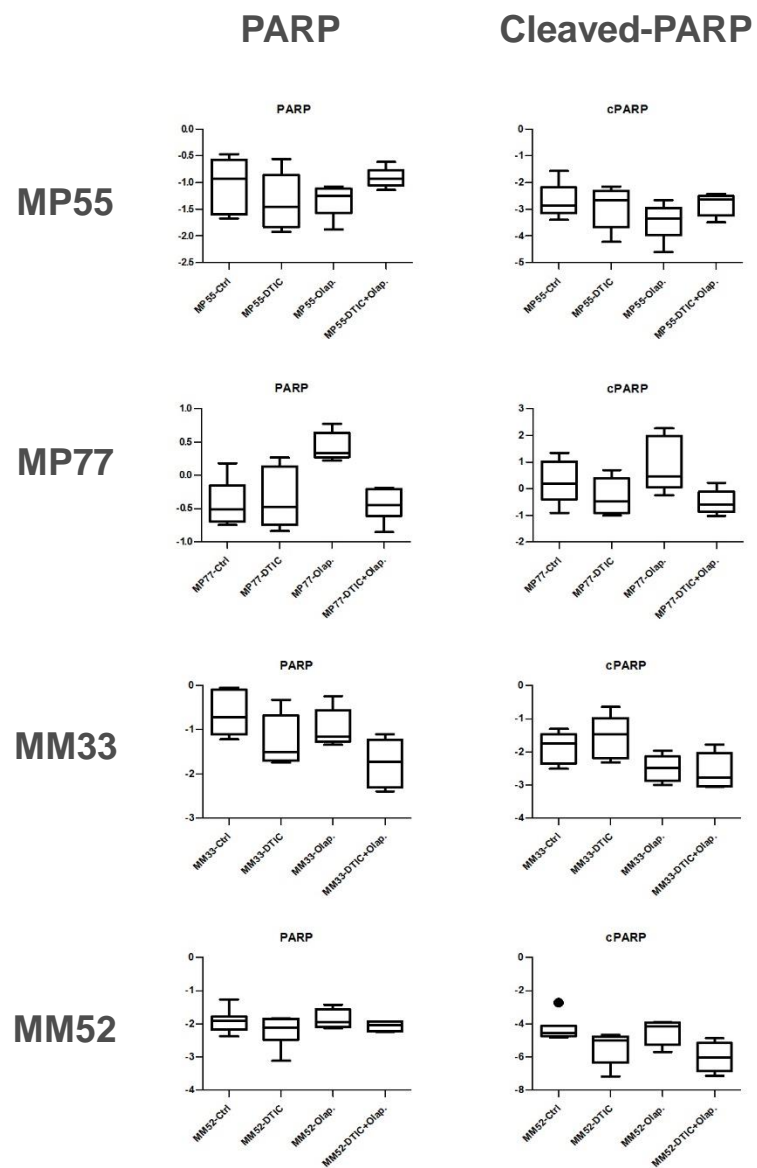

Figure S12: RPPA-based Apoptosis-related protein expression

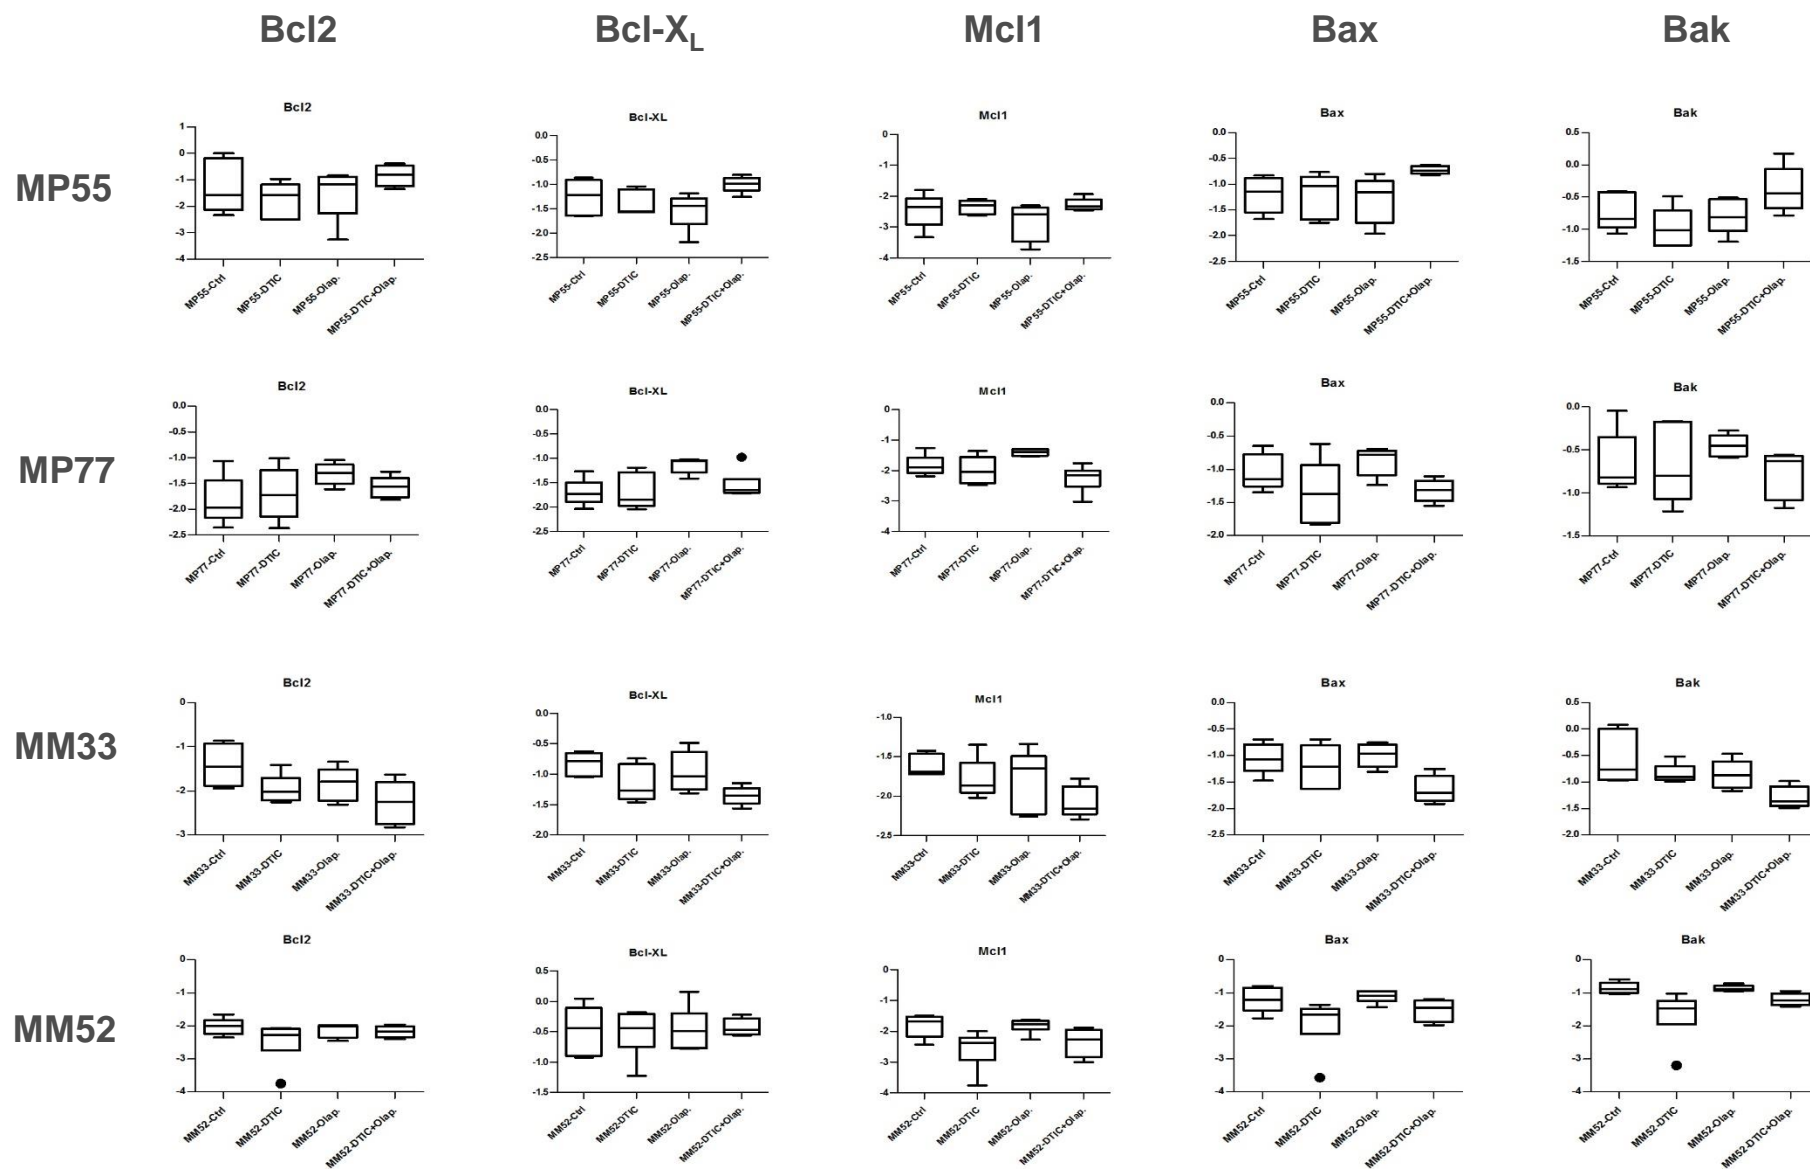

**Figure S13: MP55 PDX**

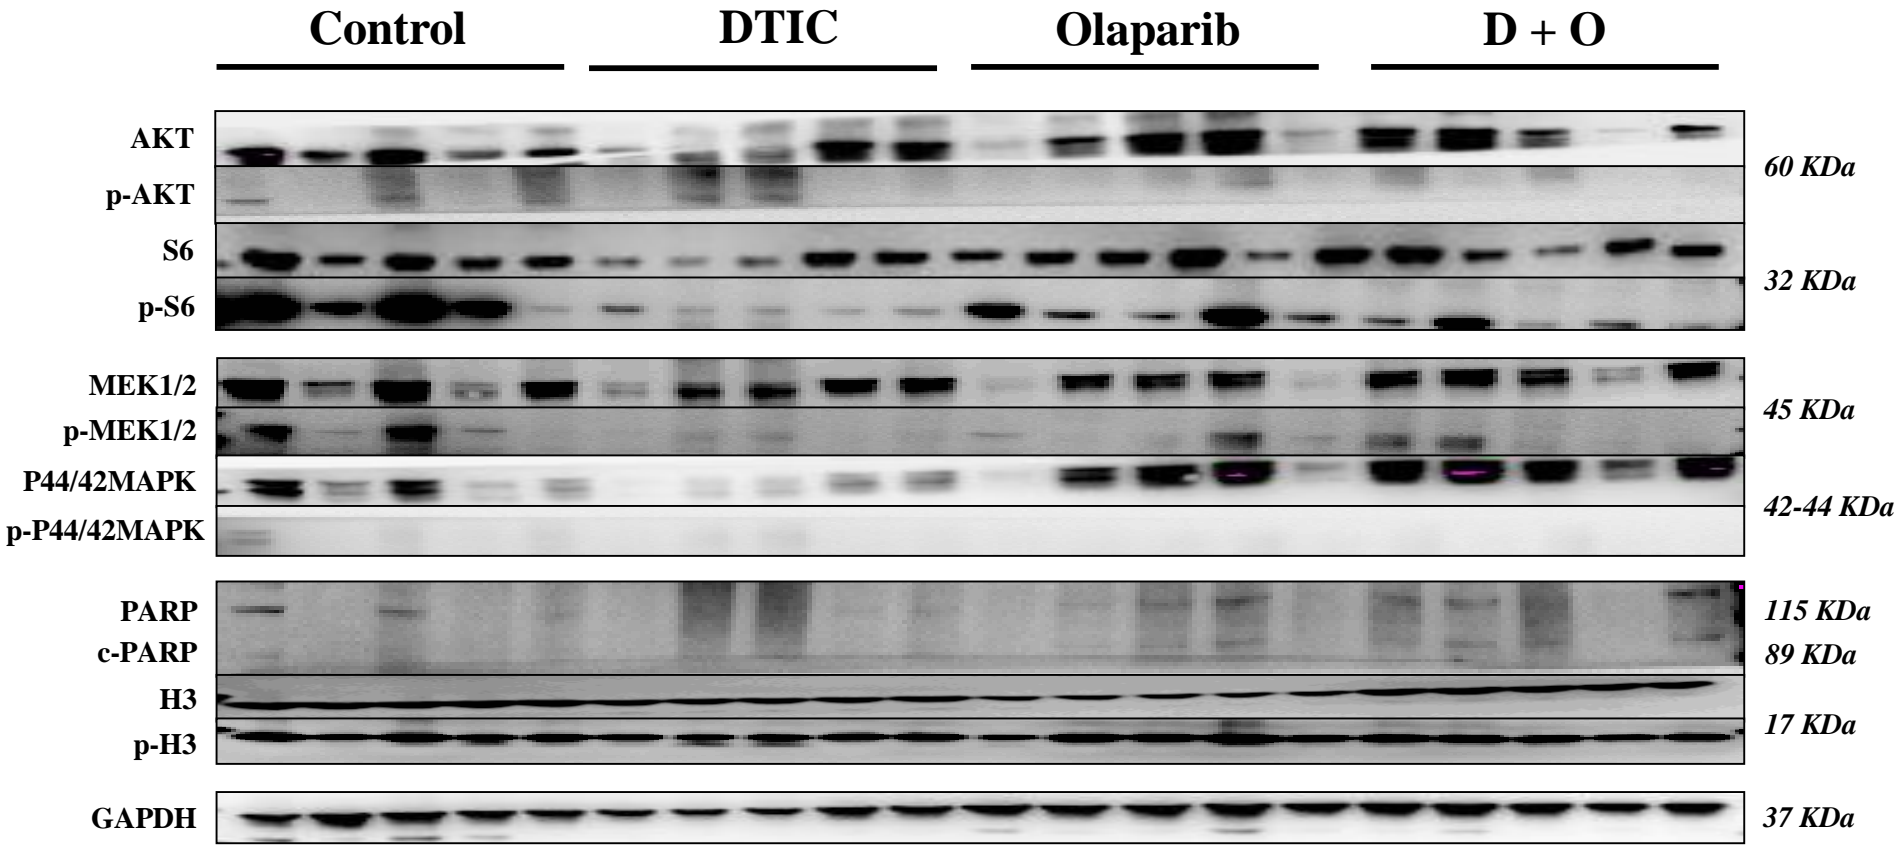

**Figure S14: MP77 PDX**

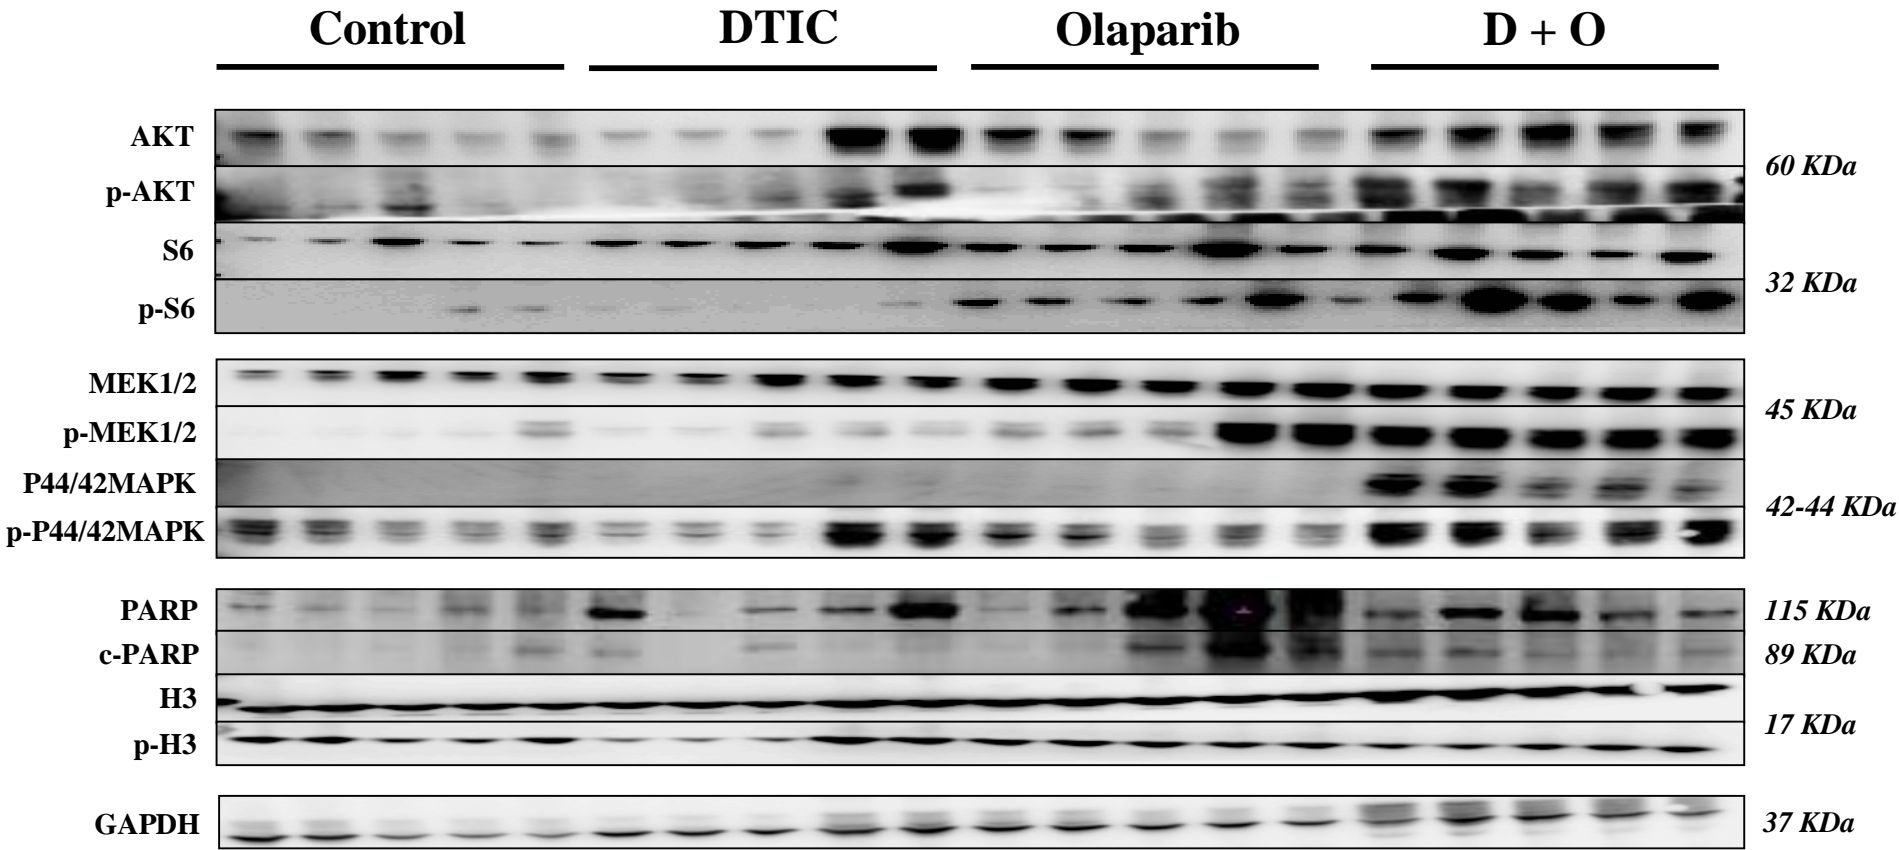

**Figure S15: MM33 PDX**

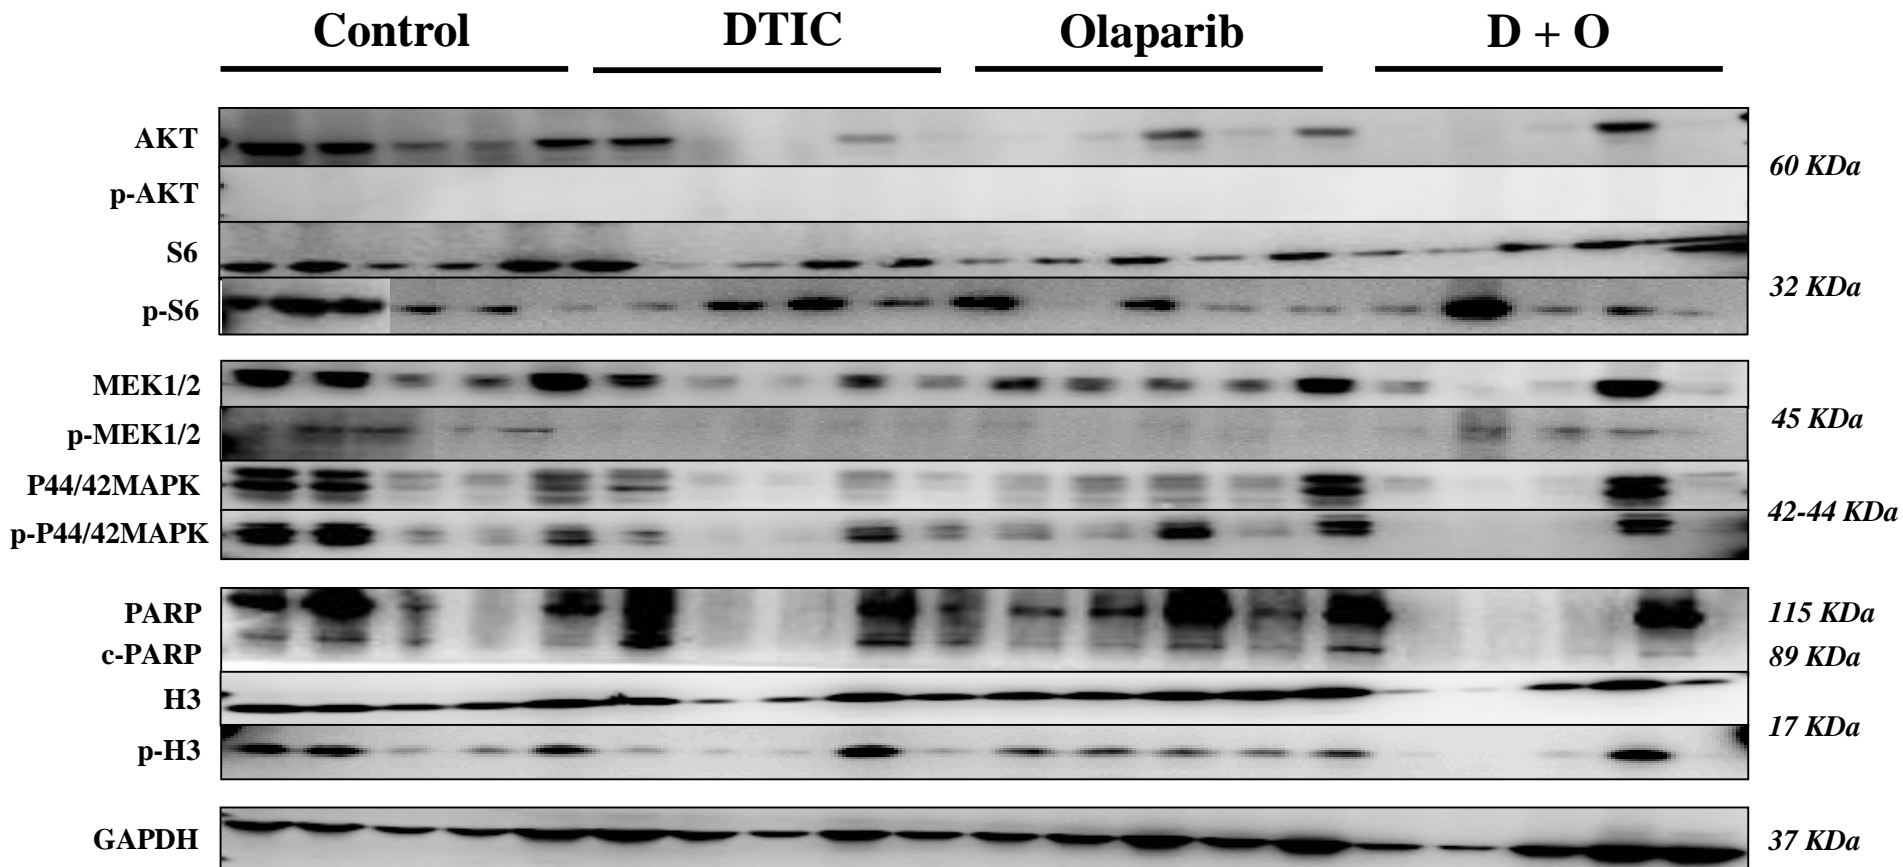

**Figure S16: MM52 PDX**

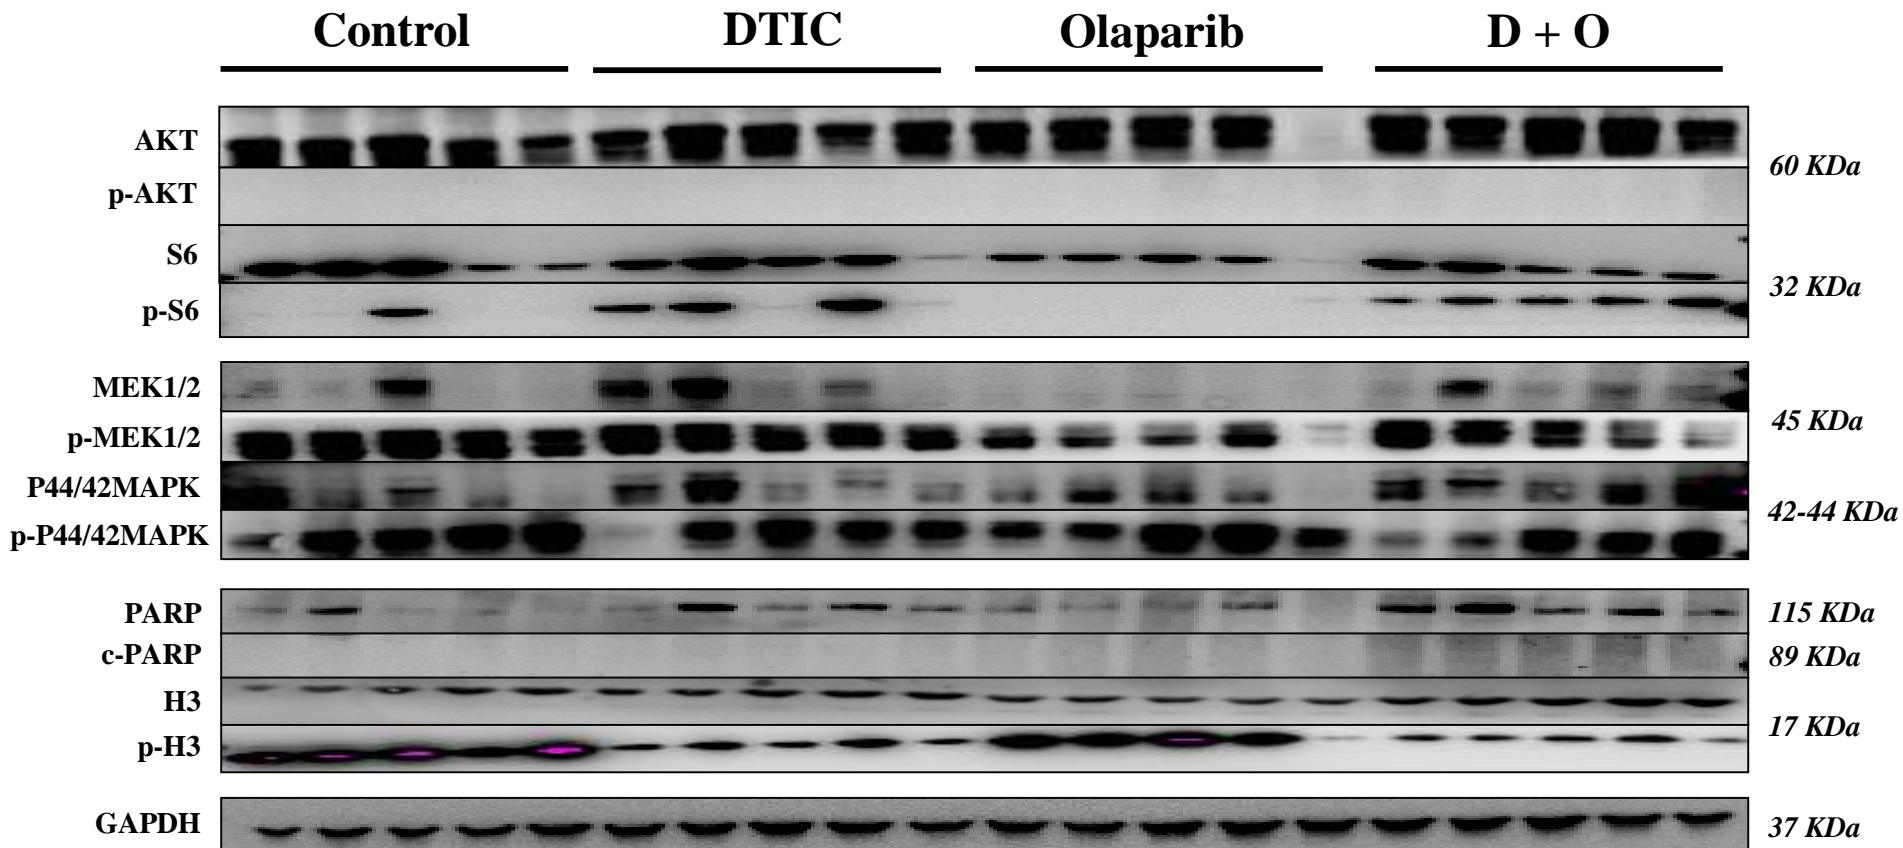

**Figure S17: WB-based PARP and c-PARP protein expression**

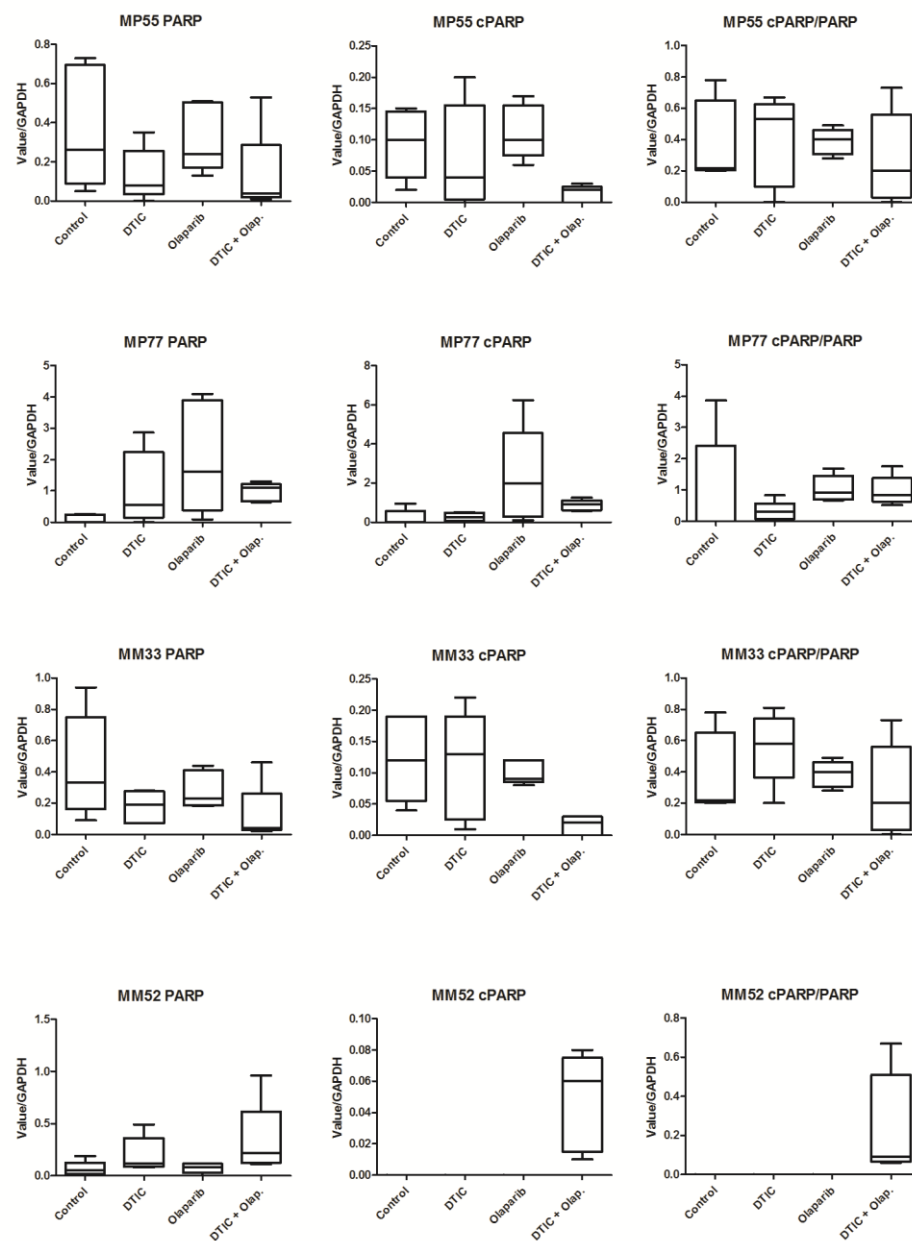

**Figure S18: IHC-based apoptosis- and cell proliferation-related protein expression**

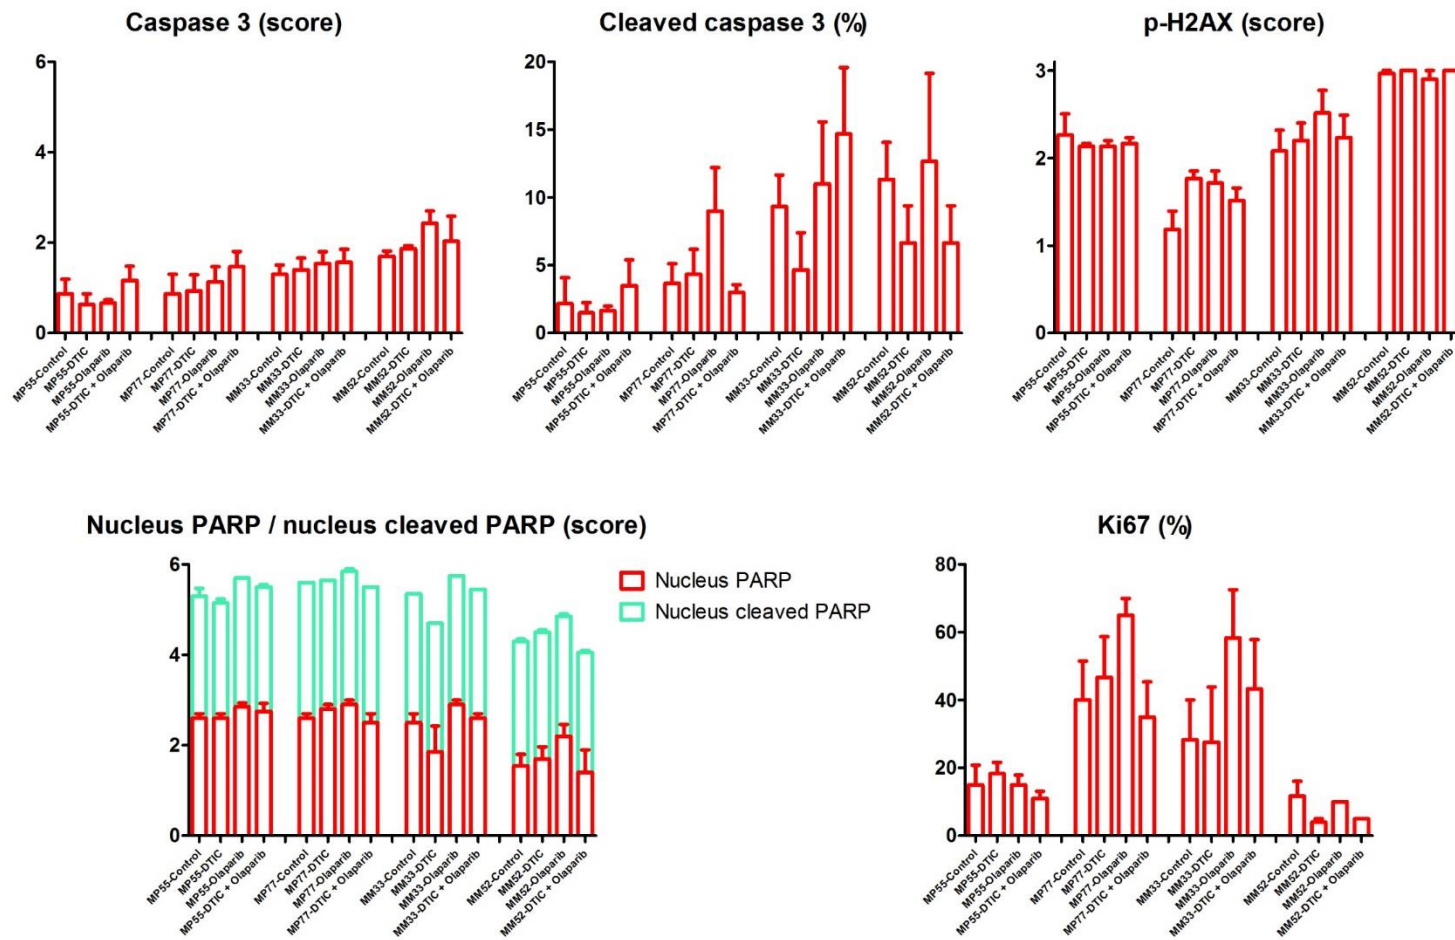

Figure S19: RPPA-based MAPK-related protein expression

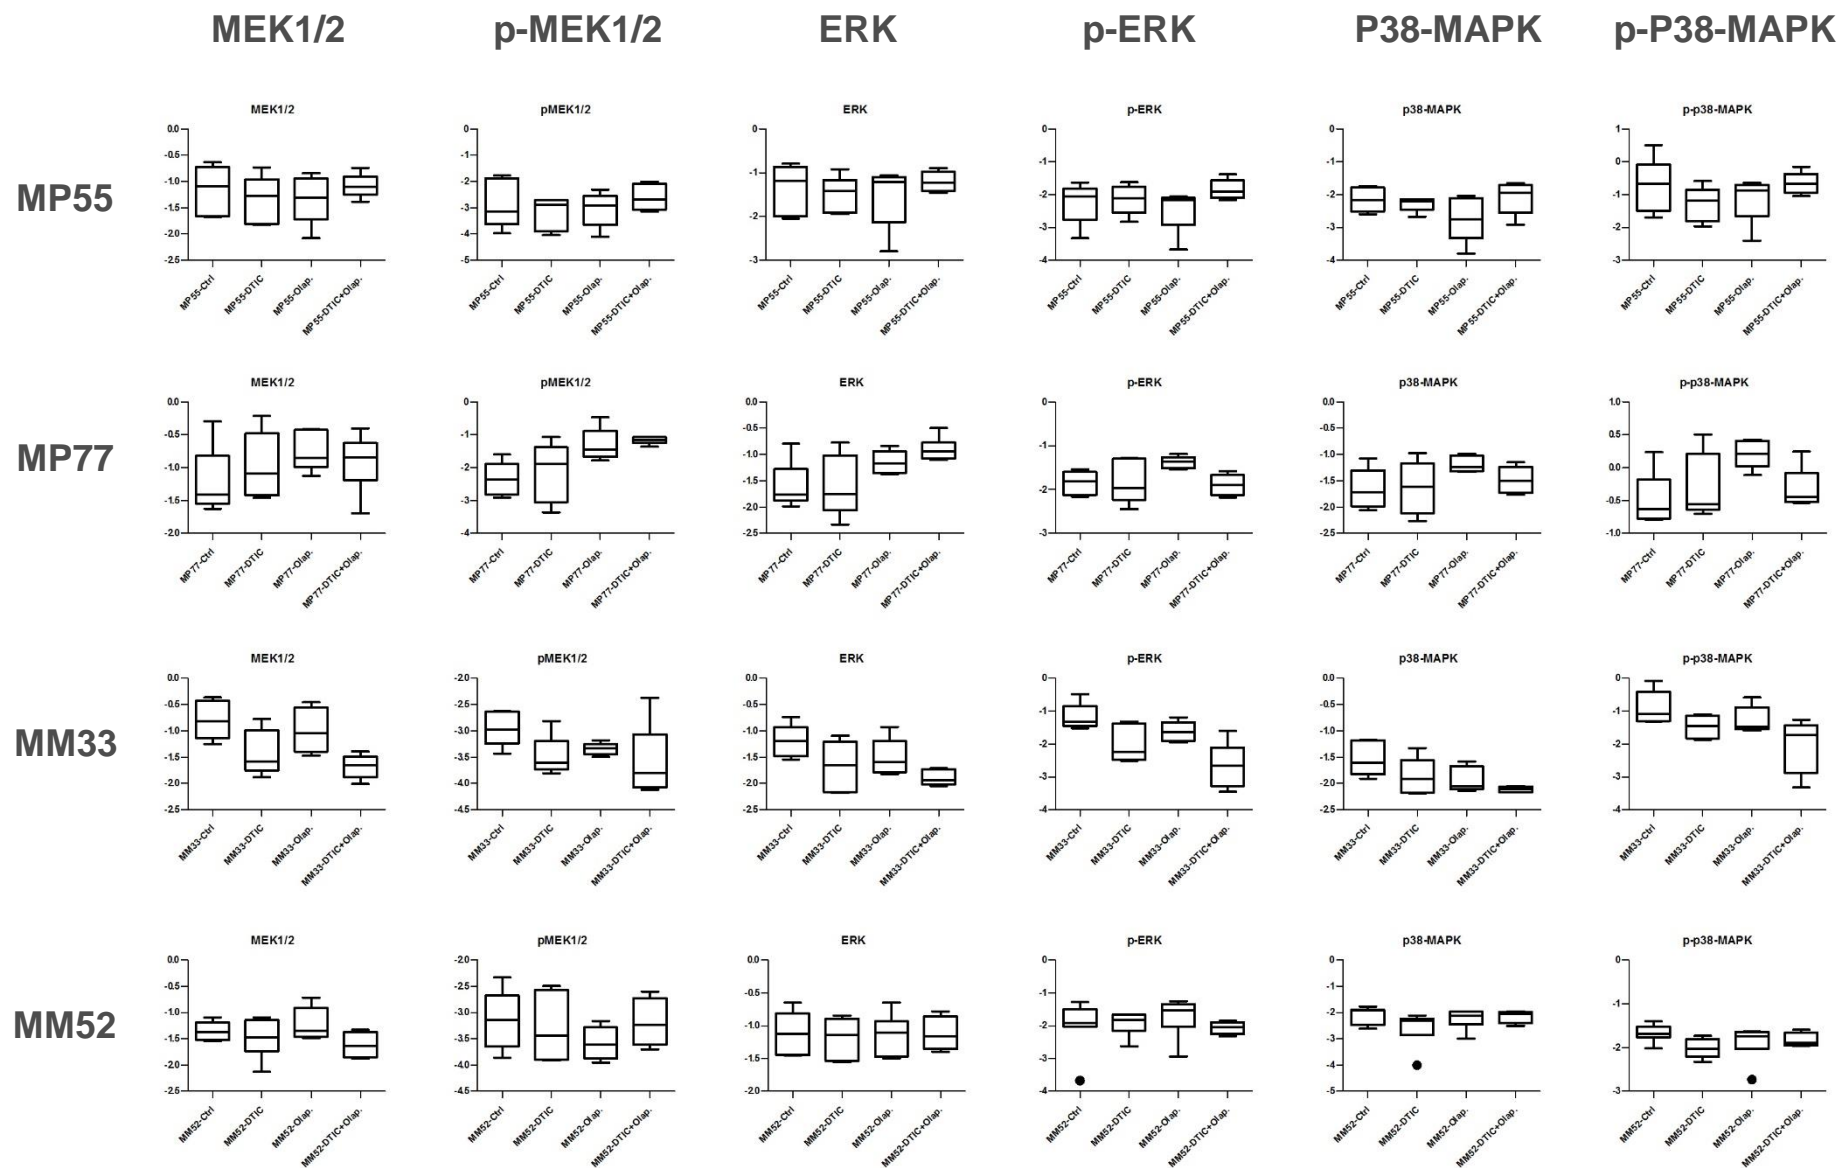

**Figure S20: RPPA-based Pi3K-related protein expression**

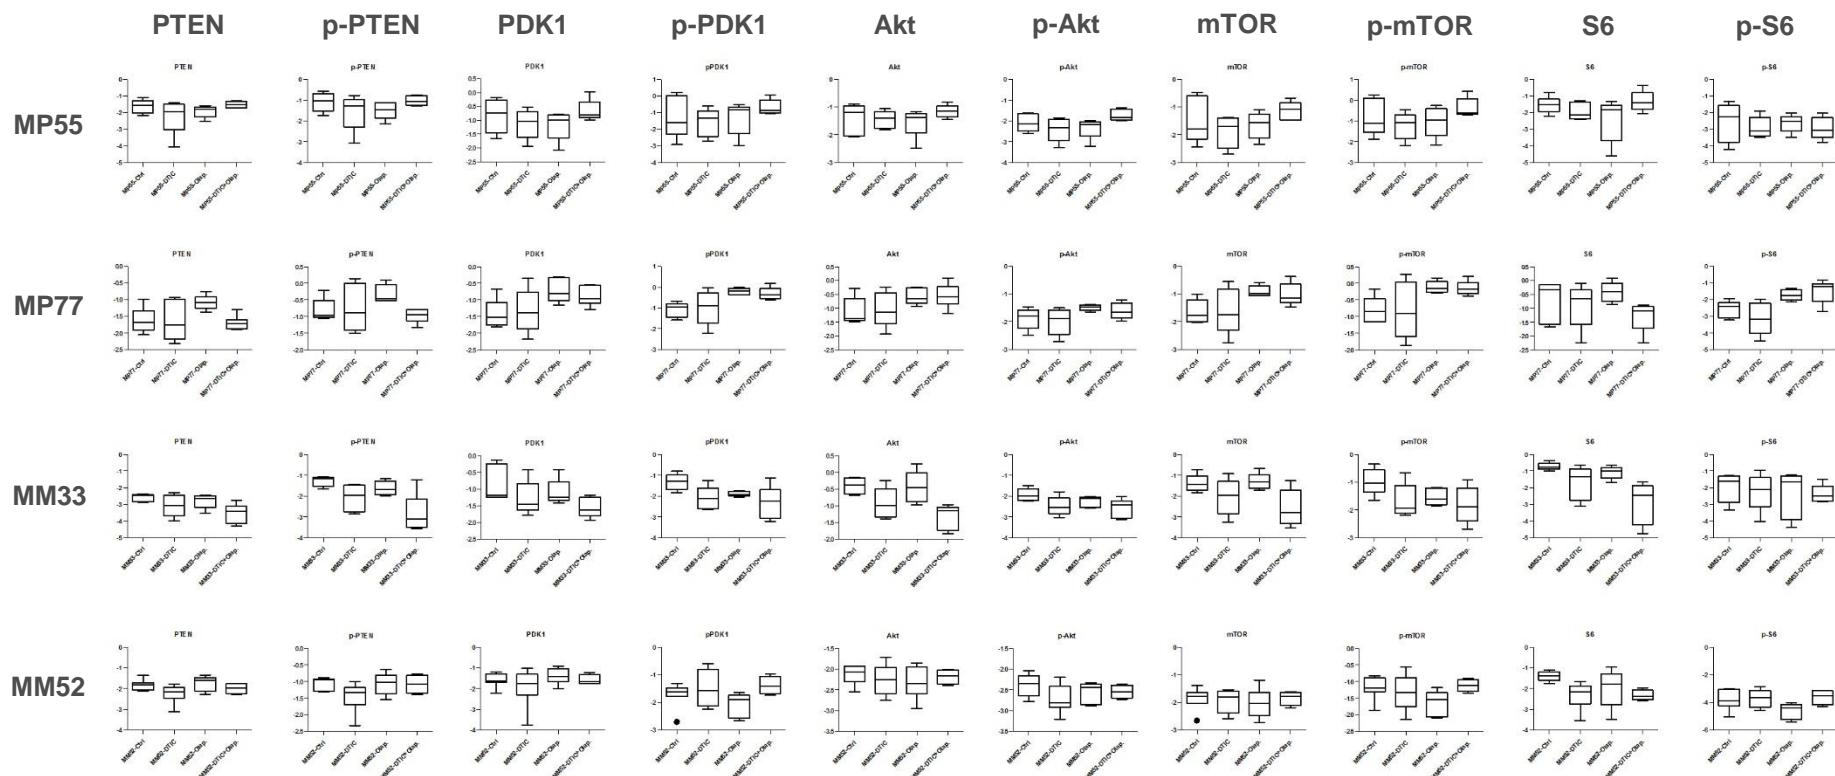

Figure S21: WB-based MAPK-related protein expression

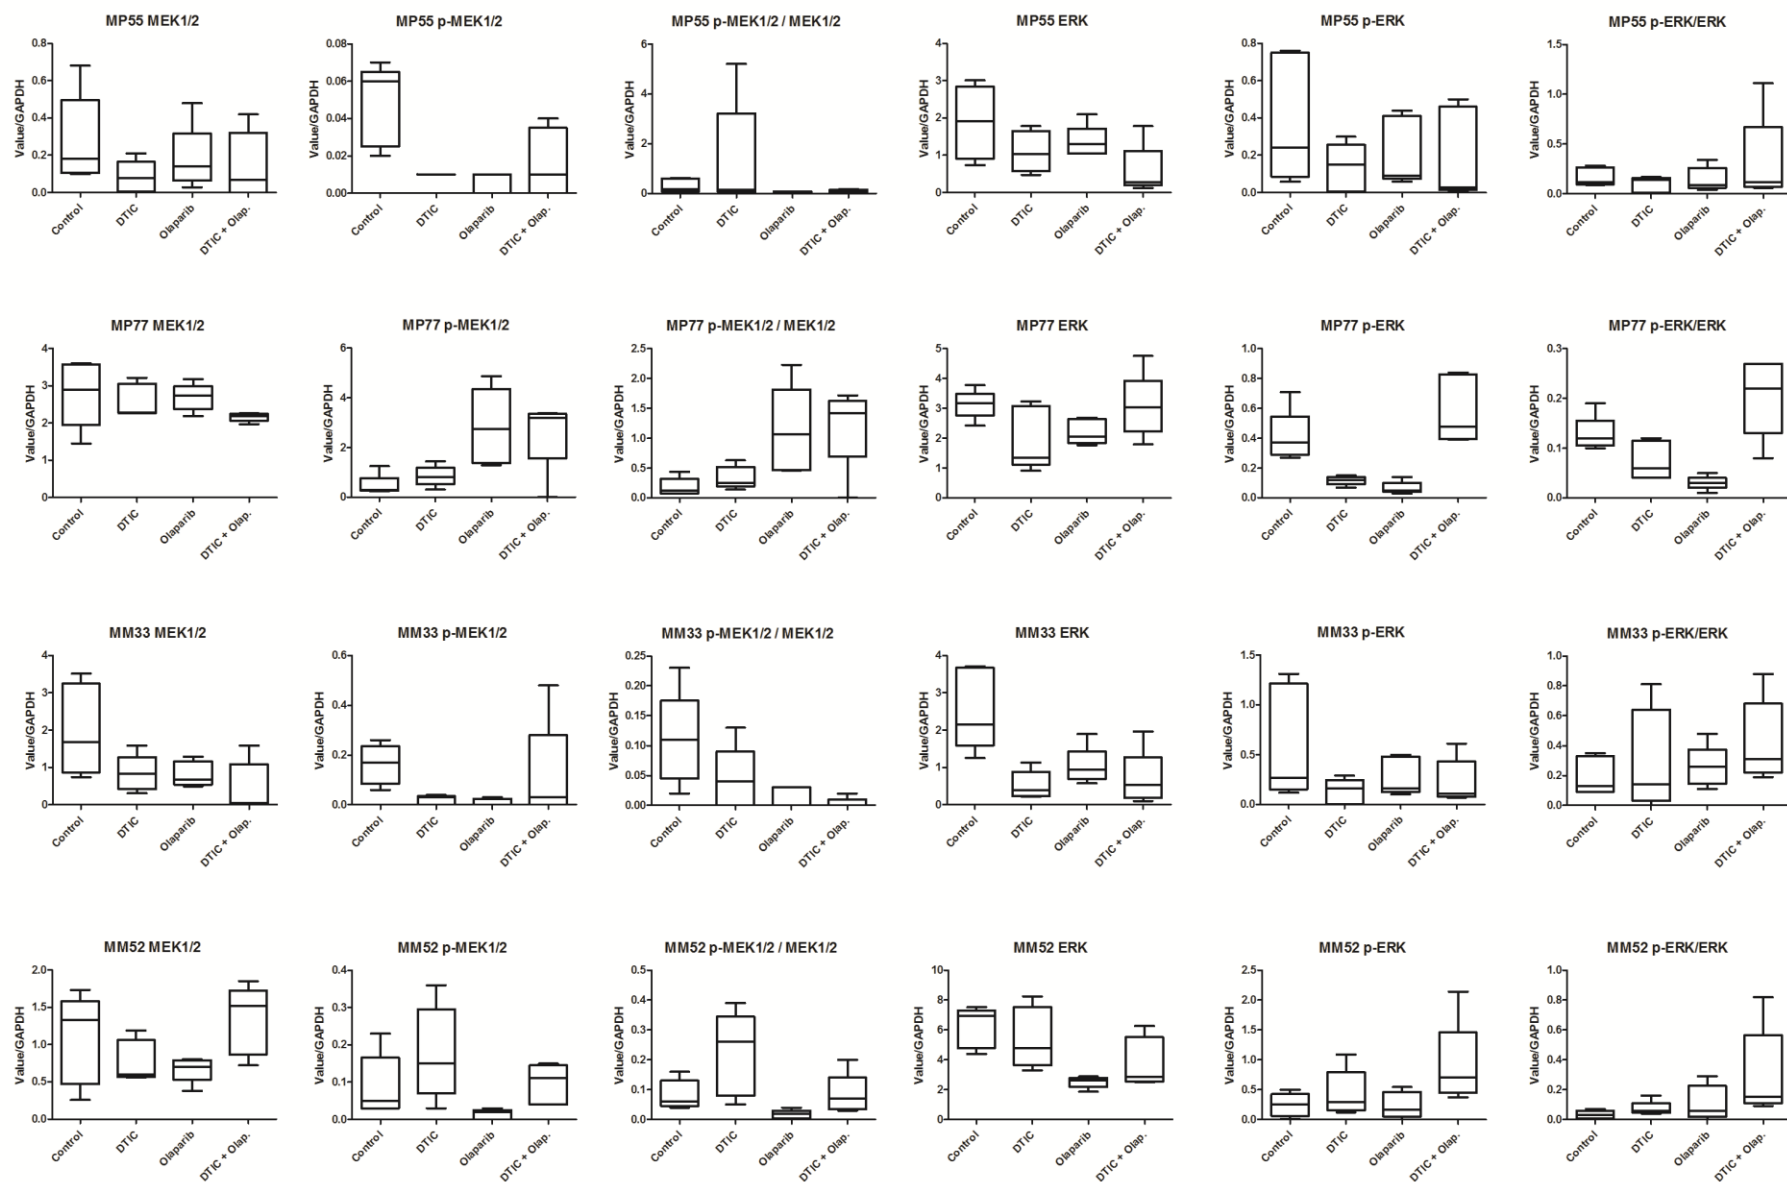

Figure S22: WB-based Pi3K-related protein expression

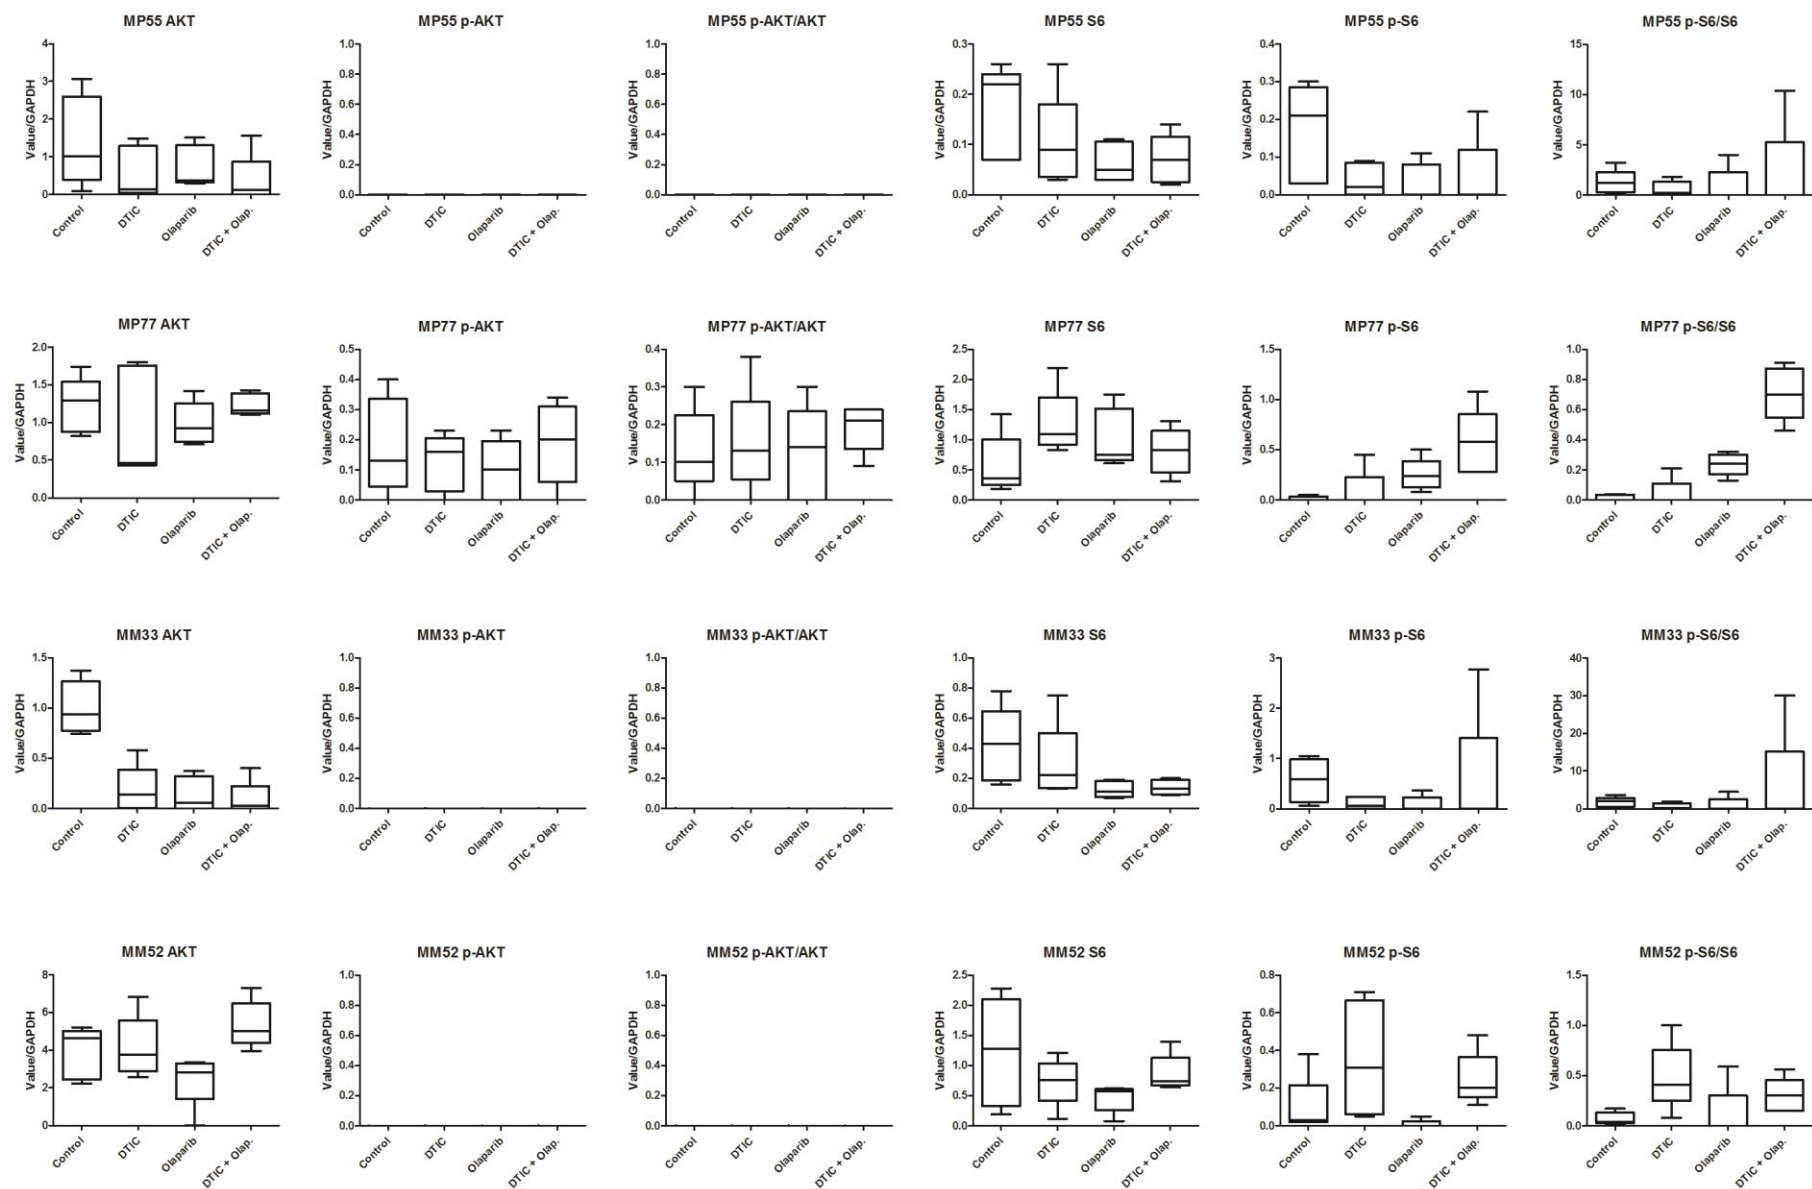

Figure S23: IHC-based MAPK-related protein expression

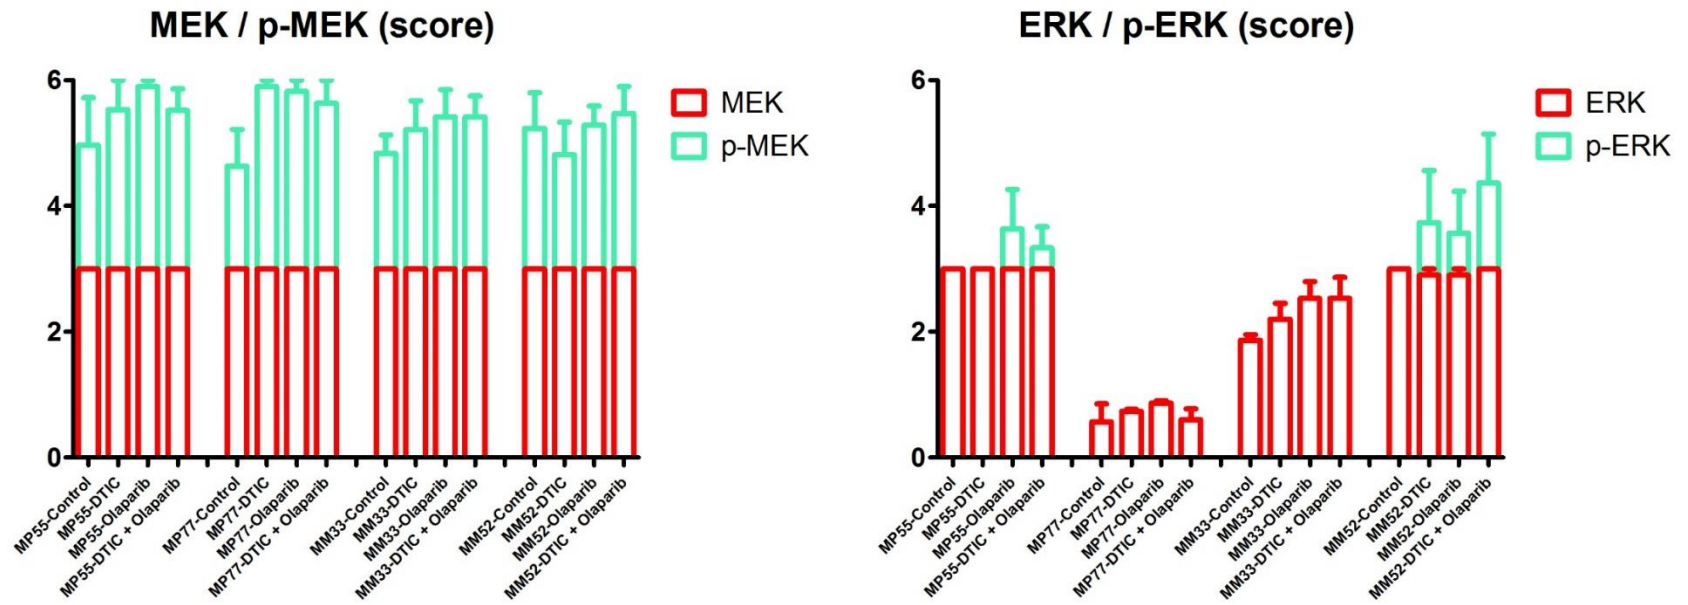

Figure S24: IHC-based Pi3K-related protein expression

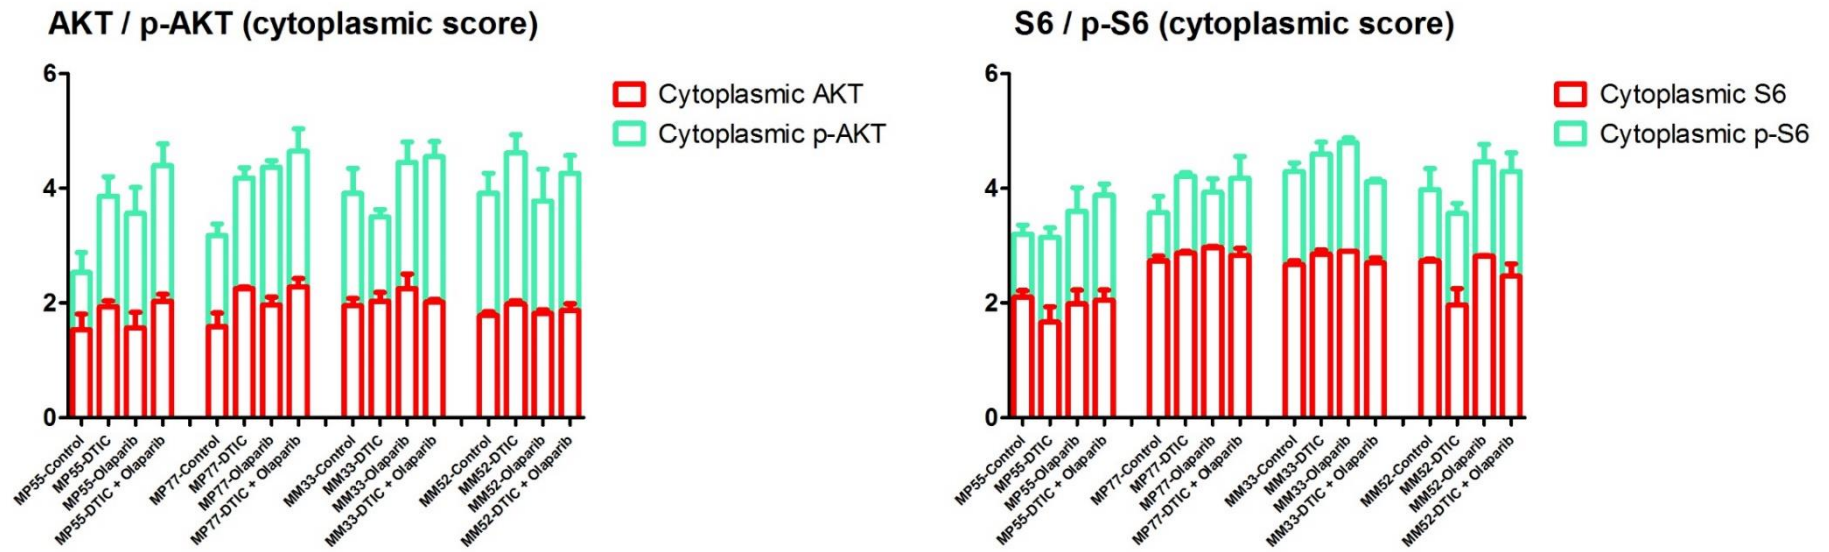

Figure S25: RPPA-based Hippo-related protein expression

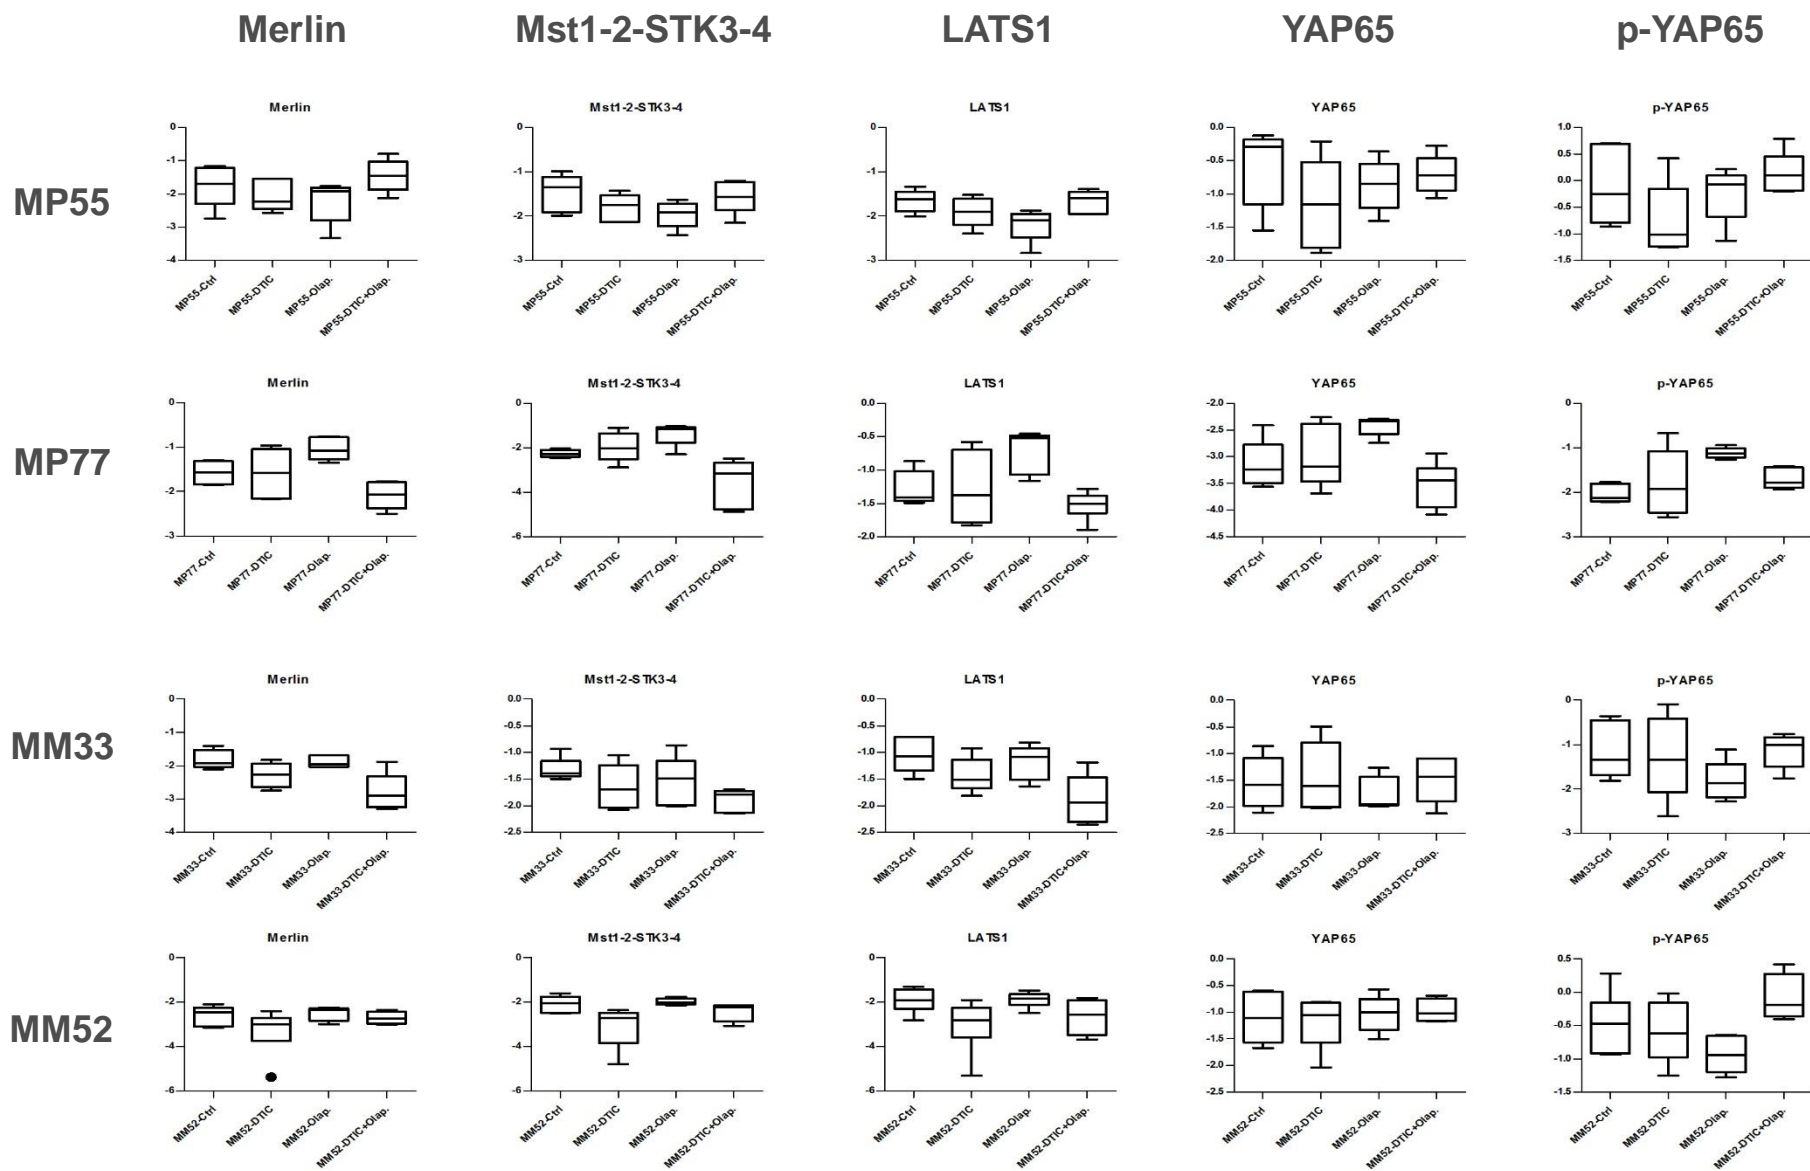

**Figure S26: Hippo-related expression modifications in four treated PDXs**

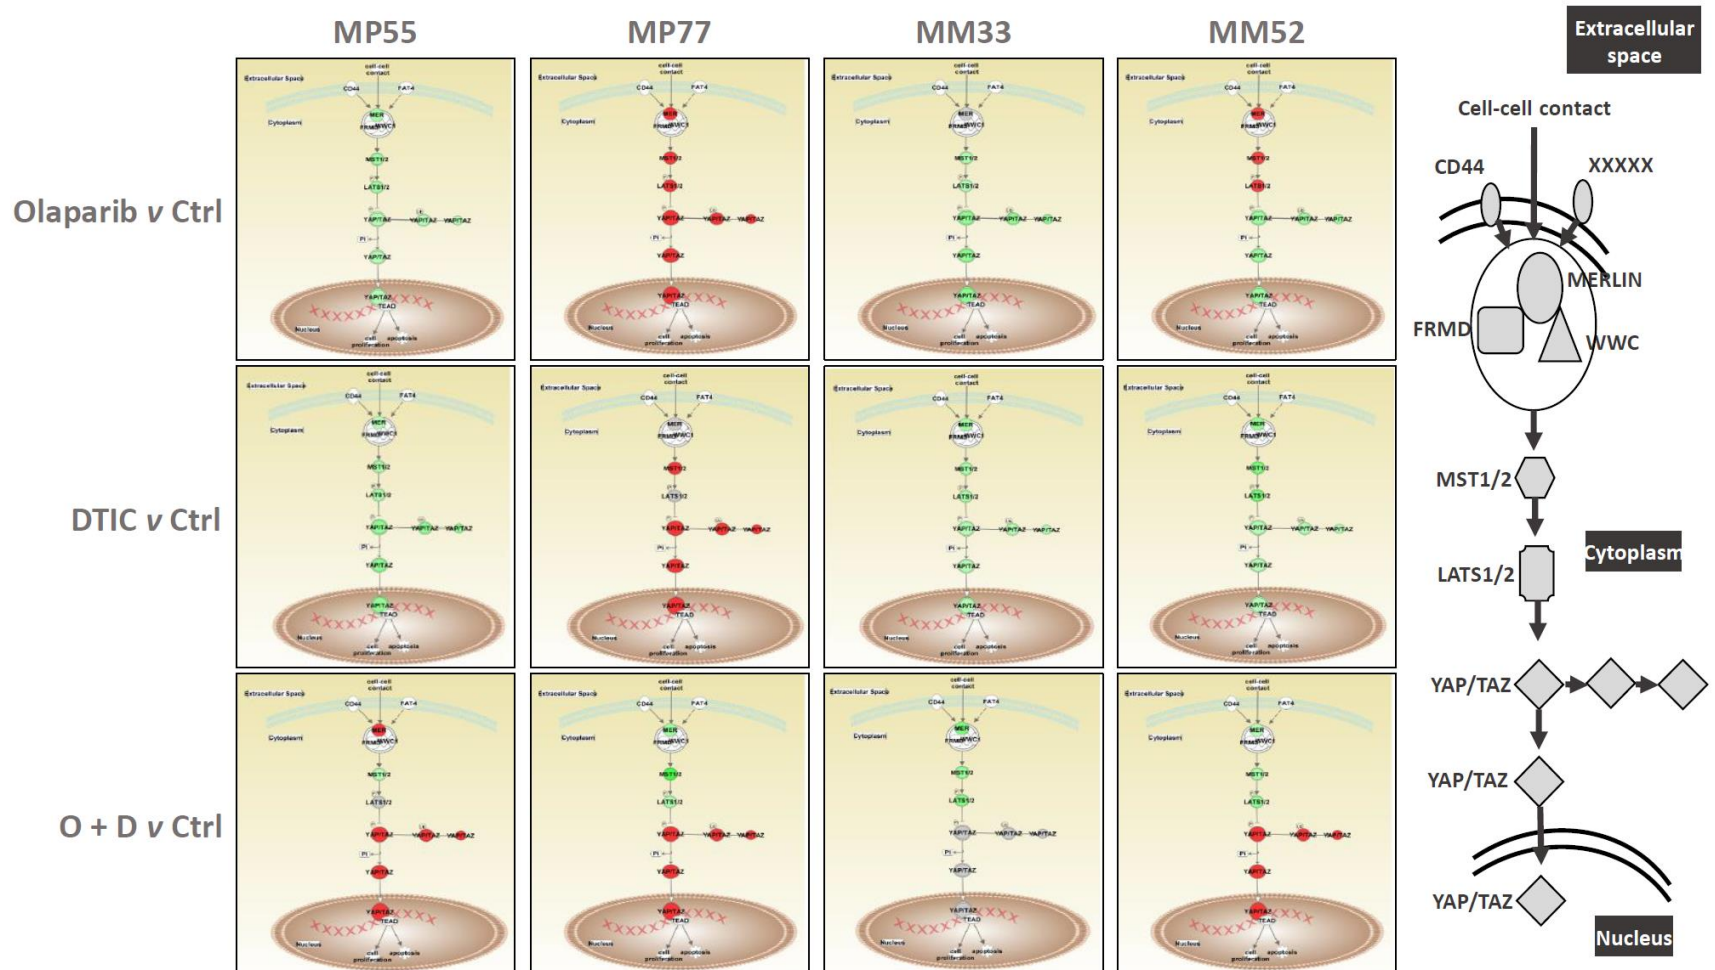

Figure S27: IHC-based Hippo-related protein expression

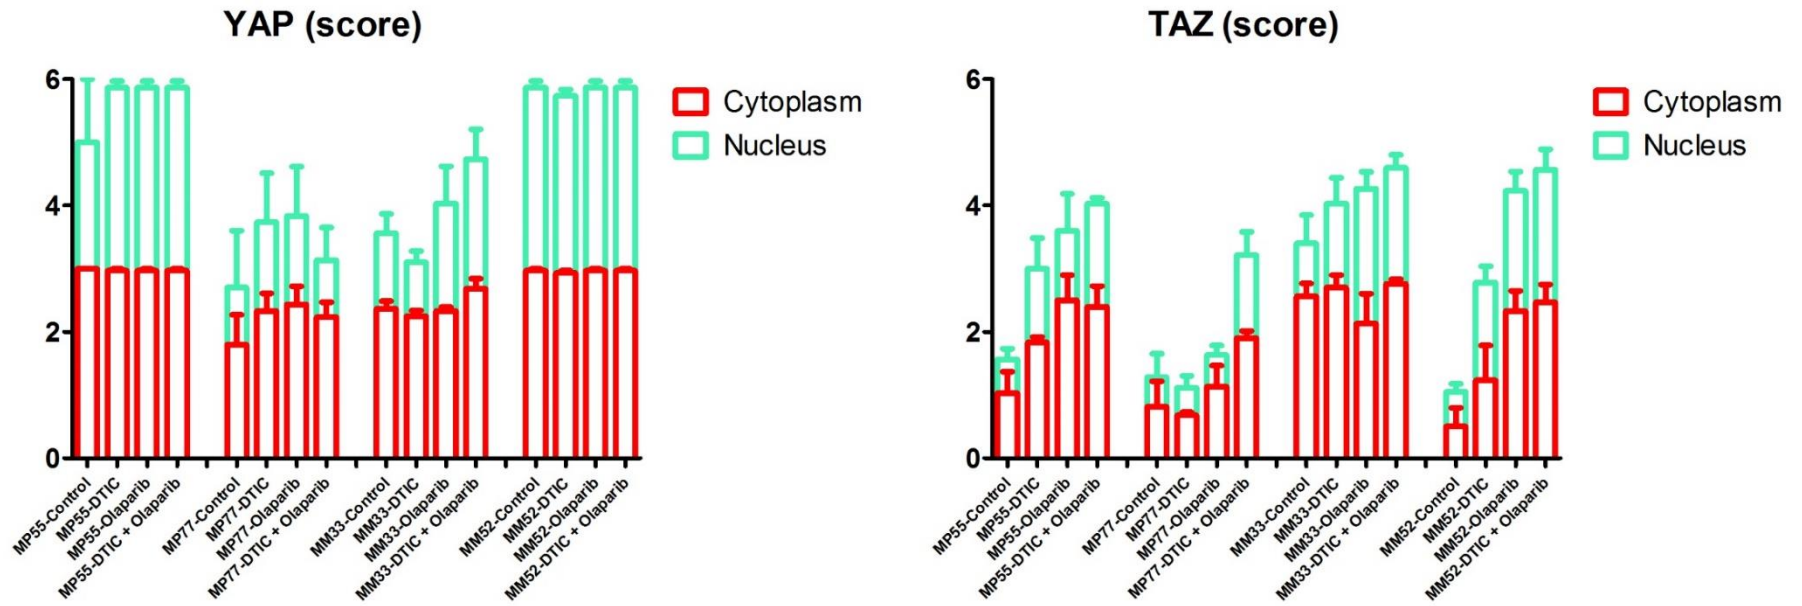

## LEGENDS TO THE SUPPLEMENTARY FIGURES

**Figure S1:** PARP protein expression in UM patients (P0) and their corresponding PDXs at various *in vivo* passages (P1, P4, and P9) as measured by RPPA. Protein expression was shown per model.

**Figure S2:** Affymetrix-based PARP family gene expression. For each transcript, box plots represent, from left to right, patient samples (P0), PDXs at passages 1, 4, and 9, and negative and positive controls.

**Figure S3:** Combination of olaparib and fotemustine. A-E. Growth curves (A) and ORR (B-E) of the four experimental groups, i.e. control (black), olaparib (blue), fotemustine (red), and olaparib + fotemustine (pink), respectively. F-G. Probability of progression of the four experimental groups: doubling time (F) and quadrupling time (G).

**Figure S4:** Combination of olaparib and everolimus. A-G. Growth curves (A-C) and ORR (D-G) of the four experimental groups, i.e. control (black), olaparib (blue), everolimus (green), and olaparib + everolimus (grey), respectively.

**Figure S5:** Combination of olaparib and AEB071. A-E. Growth curves (A) and ORR (B-E) of the four experimental groups, i.e. control (black), olaparib (blue), AEB071 (orange), and olaparib + AEB071 (brown), respectively. F-G. Probability of progression of the four experimental groups: doubling time (F) and quadrupling time (G).

**Figure S6:** Combination of olaparib and CGM097. A-E. Growth curves (A) and ORR (B-E) of the four experimental groups, i.e. control (black), olaparib (blue), CGM097 (pink), and olaparib +

CGM097 (purple), respectively. F-G. Probability of progression of the four experimental groups: doubling time (F) and quadrupling time (G).

**Figure S7:** Combination of olaparib and AZD0156. A-E. Growth curves (A) and ORR (B-E) of the four experimental groups, i.e. control (black), olaparib (blue), AZD0156 (green), and olaparib + AZD0156 (dark red), respectively. F-G. Probability of progression of the four experimental groups: doubling time (F) and quadrupling time (G).

**Figure S8:** Combination of olaparib and AZD6738. A-E. Growth curves (A) and ORR (B-E) of the four experimental groups, i.e. control (black), olaparib (blue), AZD6738 (orange), and olaparib + AZD6738 (green), respectively. F-G. Probability of progression of the four experimental groups: doubling time (F) and quadrupling time (G).

**Figure S9:** Venn diagram of the proteins significantly ( $p \leq 0.05$ ) correlated to response to DTIC alone (blue) (MP55 + MP77 + MM52 *versus* MM33), olaparib alone (green) (MM33 *versus* MP55 + MP77 + MM52), or the DTIC+ olaparib combination (red) (MP55 + MP77 + MM33 *versus* MM52).

**Figure S10:** Box plots of significant protein expression between PDXs with additive efficacy (MP55-MP77-MM33) and PDX without additive efficacy (MM52) of the DTIC + olaparib combination.

**Figure S11:** Quantification of PARP and cleaved PARP protein expression by RPPA.

**Figure S12:** Quantification of apoptosis-related protein (Bcl-2, Bcl-X<sub>L</sub>, Mcl1, Bax, and Bak) expression by RPPA.

**Figure S13:** Western Blots of the MP55 UM PDX treated with dacarbazine +/- olaparib.

**Figure S14:** Western Blots of the MP77 UM PDX treated with dacarbazine +/- olaparib.

**Figure S15:** Western Blots of the MM33 UM PDX treated with dacarbazine +/- olaparib.

**Figure S16:** Western Blots of the MM52 UM PDX treated with dacarbazine +/- olaparib.

**Figure S17:** Quantification of Western Blot intensities of PARP and cleaved PARP protein expression.

**Figure S18:** Quantification of IHC staining for apoptosis- (PARP, cleaved PARP, caspase-3, and cleaved caspase-3) and cell proliferation- (PH2AX and Ki67) related protein expression.

**Figure S19:** Quantification of MAPK-related protein (MEK1/2, p-MAK1/2, ERK, p-ERK, p38 MAPK, and p-p38 MAPK) expression by RPPA.

**Figure S20:** Quantification of Pi3K-related protein (PTEN, p-PTEN, PDK1, p-PDK1, AKT, p-AKT, mTOR, p-mTOR, S6, and p-S6) expression by RPPA.

**Figure S21:** Quantification of Western Blot intensities of MAPK-related protein (MEK1/2, p-MAK1/2, ERK, and p-ERK) expression.

**Figure S22:** Quantification of Western Blot intensities of Pi3K-related protein (AKT, p-AKT, S6, and p-S6) expression.

**Figure S23:** Quantification of IHC staining for MAPK-related protein (MEK1/2, p-MAK1/2, ERK, and p-ERK) expression.

**Figure S24:** Quantification of IHC staining for Pi3K-related protein (AKT, p-AKT, S6, and p-S6) expression.

**Figure S25:** Quantification of Hippo-related protein (Merlin, Mst1-2-STK3-4, LATS1, YAP65, and p-YAP65) expression by RPPA.

**Figure S26:** Schematic representation of Hippo-related protein expression modifications in the four treated PDXs: Olaparib *versus* control, DTIC *versus* control, and Olaparib + DTIC *versus* DTIC. The intensity of color reflects fold change. Red color: higher (phospho-)protein expression in treated than in control samples. Green color: lower (phospho-)protein expression in treated than in control samples.

**Figure S27:** Quantification of IHC staining for YAP and TAZ protein expression.

**Table S1: p values and Fold Changes (FC) in all pair comparisons of RPPA-based PARP protein expression:**

| Proteins            | P0-P1 |       | P0-P4 |       | P0-P9 |       | P1-P4 |       | P1-P9 |       | P4-P9 |       |
|---------------------|-------|-------|-------|-------|-------|-------|-------|-------|-------|-------|-------|-------|
|                     | p     | FC    |
| <b>P116.u.PARP</b>  | 0.323 | -1.04 | 0.274 | -1.13 | 0.480 | -1.53 | 0.934 | -1.09 | 0.893 | -1.47 | 0.157 | -1.35 |
| <b>P25.c.PARP</b>   | 0.329 | -1.65 | 0.914 | -1.66 | 0.305 | -3.92 | 0.417 | -1.01 | 0.478 | -2.37 | 0.579 | -2.36 |
| <b>P89.c.PARP</b>   | 0.150 | -1.27 | 0.186 | -1.55 | 0.277 | -1.73 | 0.557 | -1.22 | 0.917 | -1.36 | 0.499 | -1.12 |
| <b>Ratio u/c.25</b> | 0.888 | -1.59 | 0.419 | -1.47 | 0.570 | -2.57 | 0.527 | 1.08  | 0.424 | -1.62 | 0.904 | -1.75 |
| <b>Ratio u/c.89</b> | 0.735 | -1.22 | 0.988 | -1.37 | 0.097 | -1.14 | 0.501 | -1.12 | 0.832 | 1.07  | 0.772 | 1.20  |

**Abbreviations:** P116.u.PARP, P116 uncleaved PARP; P25.c.PARP, P25 cleaved PARP; P89.c.PARP, P89 cleaved PARP; Ratio u/c.25, ratio P116 uncleaved PARP/P25 cleaved PARP; Ratio u/c.89, ratio P116 uncleaved PARP/P89 cleaved PARP.

**Table S2: Treatments received by the UM PDX panel**

| <b>PDXs</b>  | <b>DTIC</b> | <b>Fotemustine</b> | <b>AEB071</b> | <b>AZD0156</b> | <b>AZD6738</b> | <b>CGM097</b> | <b>Everolimus</b> | <b>Olaparib</b> |
|--------------|-------------|--------------------|---------------|----------------|----------------|---------------|-------------------|-----------------|
| <b>MP34</b>  |             |                    |               | X              | X              | X             |                   | X               |
| <b>MP41</b>  | X           | X                  |               |                |                |               |                   | X               |
| <b>MP42</b>  |             |                    | X             |                |                |               |                   | X               |
| <b>MP55</b>  | X           |                    |               | X              | X              | X             |                   | X               |
| <b>MP77</b>  | X           |                    |               |                |                |               | X                 | X               |
| <b>MM26</b>  |             |                    |               | X              | X              | X             |                   | X               |
| <b>MM33</b>  | X           |                    | X             |                |                |               |                   | X               |
| <b>MM52</b>  | X           |                    | X             |                |                |               |                   | X               |
| <b>MM66</b>  | X           | X                  |               |                |                |               |                   | X               |
| <b>MM224</b> |             |                    |               | X              | X              | X             |                   | X               |
| <b>MM252</b> |             |                    |               | X              | X              | X             |                   | X               |

**Table S3: Comparisons of RPPA-based DNA repair-related protein expression between *in vivo* experimental groups**

| PDXs | TGI (%) | Comparisons | NBS1 | MRE11 | RAD50 | H2AX  | p-H2AX | H3   | ATM   | p-ATM | p-DNA-PK | Ku80 | 53BP1 | p-53BP1 | FANCD2 | p-FANCD2 | Ape1  | RAD51 | p-Chk1 | p-Chk2 | P53   | p-P53 | SUV39H1 | MSH2   | Hep90 $\alpha$ | ERCC1  |
|------|---------|-------------|------|-------|-------|-------|--------|------|-------|-------|----------|------|-------|---------|--------|----------|-------|-------|--------|--------|-------|-------|---------|--------|----------------|--------|
| MP55 | 32      | C vs O      | NS   | NS    | NS    | NS    | NS     | NS   | NS    | NS    | NS       | NS   | NS    | NS      | NS     | NS       | NS    | NS    | NS     | NS     | NS    | NS    | NS      | NS     | 0.04           | NS     |
|      | 35      | C vs D      | NS   | NS    | NS    | NS    | NS     | NS   | NS    | NS    | NS       | NS   | NS    | NS      | NS     | NS       | NS    | NS    | NS     | NS     | NS    | NS    | NS      | NS     | NS             | NS     |
|      | 65      | C vs O + D  | NS   | NS    | NS    | 0.03  | NS     | NS   | NS    | NS    | NS       | NS   | NS    | NS      | NS     | NS       | NS    | NS    | NS     | NS     | NS    | NS    | NS      | NS     | NS             | NS     |
|      | /       | O vs O + D  | NS   | 0.009 | NS    | 0.003 | 0.03   | NS   | NS    | NS    | NS       | NS   | NS    | NS      | 0.05   | 0.02     | 0.03  | 0.03  | NS     | 0.03   | NS    | 0.002 | NS      | NS     | 0.02           | 0.05   |
| MP77 | /       | D vs O + D  | NS   | NS    | NS    | NS    | NS     | NS   | NS    | NS    | NS       | NS   | NS    | NS      | NS     | NS       | 0.006 | 0.03  | NS     | NS     | NS    | NS    | NS      | NS     | NS             | NS     |
|      | 19      | C vs O      | NS   | NS    | NS    | NS    | NS     | NS   | 0.01  | 0.03  | NS       | NS   | NS    | 0.0005  | 0.03   | 0.04     | NS    | NS    | NS     | 0.009  | 0.03  | 0.03  | NS      | NS     | NS             | NS     |
|      | 73      | C vs D      | NS   | NS    | NS    | NS    | NS     | NS   | NS    | NS    | NS       | NS   | NS    | NS      | NS     | NS       | NS    | NS    | NS     | NS     | NS    | NS    | NS      | NS     | NS             | NS     |
|      | 96      | C vs O + D  | NS   | NS    | NS    | NS    | NS     | 0.03 | NS    | NS    | NS       | NS   | NS    | NS      | NS     | NS       | NS    | NS    | NS     | NS     | NS    | NS    | NS      | 0.04   | 0.02           | NS     |
| MM33 | /       | O vs O + D  | 0.01 | 0.001 | NS    | NS    | NS     | 0.01 | 0.001 | 0.003 | 0.02     | 0.01 | 0.003 | 0.00007 | 0.008  | 0.01     | NS    | NS    | 0.01   | 0.0007 | 0.005 | 0.005 | 0.0009  | 0.0004 | 0.002          | 0.0003 |
|      | /       | D vs O + D  | NS   | NS    | NS    | NS    | NS     | NS   | NS    | NS    | NS       | NS   | NS    | NS      | NS     | NS       | NS    | NS    | NS     | NS     | NS    | NS    | NS      | NS     | NS             | NS     |
|      | 36      | C vs O      | NS   | NS    | NS    | NS    | NS     | NS   | NS    | NS    | NS       | NS   | NS    | NS      | NS     | NS       | NS    | NS    | NS     | NS     | NS    | NS    | NS      | NS     | NS             | NS     |
|      | 17      | C vs D      | NS   | NS    | NS    | NS    | 0.03   | NS   | NS    | NS    | NS       | NS   | NS    | NS      | NS     | NS       | NS    | NS    | NS     | NS     | NS    | NS    | NS      | NS     | NS             | NS     |
| MM52 | 55      | C vs O + D  | 0.03 | NS    | 0.01  | 0.03  | 0.008  | 0.02 | NS    | NS    | 0.05     | NS   | 0.01  | 0.007   | 0.01   | 0.02     | 0.01  | NS    | 0.03   | NS     | 0.001 | 0.04  | NS      | 0.03   | NS             | 0.02   |
|      | /       | O vs O + D  | NS   | NS    | NS    | NS    | NS     | NS   | NS    | NS    | NS       | NS   | NS    | 0.03    | 0.007  | NS       | 0.04  | NS    | 0.04   | NS     | 0.008 | NS    | NS      | NS     | NS             | NS     |
|      | /       | D vs O + D  | NS   | NS    | NS    | NS    | NS     | 0.04 | NS    | NS    | NS       | NS   | NS    | NS      | NS     | NS       | NS    | NS    | NS     | NS     | NS    | NS    | NS      | NS     | NS             | NS     |
|      | 0       | C vs O      | NS   | NS    | NS    | NS    | NS     | NS   | NS    | NS    | NS       | NS   | NS    | NS      | NS     | NS       | NS    | NS    | NS     | NS     | NS    | NS    | NS      | NS     | NS             | NS     |
| MM52 | 51      | C vs D      | NS   | NS    | NS    | NS    | NS     | NS   | NS    | NS    | NS       | NS   | NS    | NS      | NS     | NS       | NS    | NS    | NS     | NS     | NS    | NS    | NS      | NS     | NS             | NS     |
|      | 44      | C vs O + D  | NS   | 0.04  | NS    | NS    | NS     | NS   | NS    | NS    | NS       | NS   | NS    | NS      | NS     | NS       | NS    | 0.01  | NS     | NS     | NS    | NS    | NS      | 0.005  | 0.01           | NS     |
|      | /       | O vs O + D  | NS   | 0.01  | NS    | NS    | NS     | NS   | NS    | NS    | NS       | NS   | NS    | NS      | NS     | NS       | NS    | NS    | NS     | NS     | NS    | NS    | NS      | NS     | 0.002          | NS     |
|      | /       | D vs O + D  | NS   | NS    | NS    | NS    | NS     | NS   | NS    | NS    | NS       | NS   | NS    | NS      | NS     | NS       | NS    | NS    | NS     | NS     | NS    | NS    | NS      | NS     | 0.002          | 0.03   |

**Abbreviations:** TGI, Tumor Growth Inhibition; C, Control group; O, Olaparib group; D, DTIC group; O + D, Olaparib + DTIC group; NS, not significant.

Significant differences of protein expression between studied groups are indicated in red.

**Table S4: Comparisons of RPPA-based PARP protein expression between *in vivo* experimental groups**

| PDXs     | TGI (%) | Comparisons | PARP   | Cleaved-PARP |
|----------|---------|-------------|--------|--------------|
| MP55     | 32      | C vs O      | NS     | NS           |
|          | 35      | C vs D      | NS     | NS           |
|          | 65      | C vs O + D  | NS     | NS           |
|          | /       | O vs O + D  | 0.05   | NS           |
|          | /       | D vs O + D  | NS     | NS           |
| MP77 (1) | 19      | C vs O      | 0.003  | NS           |
|          | 73      | C vs D      | NS     | NS           |
|          | 96      | C vs O + D  | NS     | NS           |
|          | /       | O vs O + D  | 0.0001 | 0.03         |
|          | /       | D vs O + D  | NS     | NS           |
| MM33     | 36      | C vs O      | NS     | NS           |
|          | 17      | C vs D      | NS     | NS           |
|          | 55      | C vs O + D  | 0.01   | NS           |
|          | /       | O vs O + D  | 0.04   | NS           |
|          | /       | D vs O + D  | NS     | 0.03         |
| MM52     | 0       | C vs O      | NS     | NS           |
|          | 51      | C vs D      | NS     | 0.04         |
|          | 44      | C vs O + D  | NS     | 0.02         |
|          | /       | O vs O + D  | NS     | 0.04         |
|          | /       | D vs O + D  | NS     | NS           |

**Abbreviations:** TGI, Tumor Growth Inhibition; C, Control group; O, Olaparib group; D, DTIC group; O + D, Olaparib + DTIC group; NS, not significant.

Significant differences of protein expression between studied groups are indicated in red.

**Table S5: Comparisons of RPPA-based Apoptose-related protein expression between *in vivo* experimental groups**

| PDXs     | TGI (%) | Comparisons | Bcl2 | Bcl-X <sub>L</sub> | Mcl1  | Bax   | Bak   |
|----------|---------|-------------|------|--------------------|-------|-------|-------|
| MP55     | 32      | C vs O      | NS   | NS                 | NS    | NS    | NS    |
|          | 35      | C vs D      | NS   | NS                 | NS    | NS    | NS    |
|          | 65      | C vs O + D  | NS   | NS                 | NS    | 0.04  | NS    |
|          | /       | O vs O + D  | NS   | 0.03               | NS    | 0.04  | NS    |
|          | /       | D vs O + D  | 0.04 | 0.03               | NS    | NS    | 0.03  |
| MP77 (1) | 19      | C vs O      | NS   | 0.007              | 0.05  | NS    | NS    |
|          | 73      | C vs D      | NS   | NS                 | NS    | NS    | NS    |
|          | 96      | C vs O + D  | NS   | NS                 | NS    | NS    | NS    |
|          | /       | O vs O + D  | NS   | 0.02               | 0.004 | 0.007 | 0.04  |
|          | /       | D vs O + D  | NS   | NS                 | NS    | NS    | NS    |
| MM33     | 36      | C vs O      | NS   | NS                 | NS    | NS    | NS    |
|          | 17      | C vs D      | NS   | NS                 | NS    | NS    | NS    |
|          | 55      | C vs O + D  | 0.02 | 0.002              | 0.004 | 0.009 | 0.03  |
|          | /       | O vs O + D  | NS   | NS                 | NS    | 0.003 | 0.03  |
|          | /       | D vs O + D  | NS   | NS                 | NS    | NS    | 0.007 |
| MM52     | 0       | C vs O      | NS   | NS                 | NS    | NS    | NS    |
|          | 51      | C vs D      | NS   | NS                 | 0.03  | NS    | 0.05  |
|          | 44      | C vs O + D  | NS   | NS                 | NS    | NS    | 0.02  |
|          | /       | O vs O + D  | NS   | NS                 | NS    | NS    | 0.03  |
|          | /       | D vs O + D  | NS   | NS                 | NS    | NS    | NS    |

**Abbreviations:** TGI, Tumor Growth Inhibition; C, Control group; O, Olaparib group; D, DTIC group; O + D, Olaparib + DTIC group; NS, not significant.

Significant differences of protein expression between studied groups are indicated in red.

**Table S6: Comparisons of WB-based protein expression between  
*in vivo* experimental groups**

| Proteins | PDXs | O v C                                                               | D v C        | O + D v C    | O + D v O    | O + D v D    |
|----------|------|---------------------------------------------------------------------|--------------|--------------|--------------|--------------|
| PARP     | MP55 | NS                                                                  | NS           | NS           | NS           | NS           |
|          | MP77 | <b>0.04</b>                                                         | NS           | <b>0.01</b>  | NS           | NS           |
|          | MM33 | NS                                                                  | NS           | NS           | NS           | NS           |
|          | MM52 | NS                                                                  | NS           | <b>0.03</b>  | <b>0.03</b>  | NS           |
| c-PARP   | MP55 | NS                                                                  | NS           | <b>0.03</b>  | <b>0.01</b>  | NS           |
|          | MP77 | NS                                                                  | NS           | NS           | NS           | <b>0.008</b> |
|          | MM33 | NS                                                                  | NS           | <b>0.01</b>  | <b>0.01</b>  | NS           |
|          | MM52 | NS                                                                  | NS           | NS           | NS           | NS           |
| H3       | MP55 | <b>0.02</b>                                                         | NS           | NS           | NS           | NS           |
|          | MP77 | NS                                                                  | NS           | NS           | NS           | NS           |
|          | MM33 | NS                                                                  | NS           | <b>0.008</b> | <b>0.008</b> | NS           |
|          | MM52 | <b>0.04</b>                                                         | NS           | NS           | <b>0.04</b>  | NS           |
| p-H3     | MP55 | NS                                                                  | NS           | NS           | NS           | NS           |
|          | MP77 | NS                                                                  | NS           | <b>0.02</b>  | NS           | NS           |
|          | MM33 | NS                                                                  | NS           | <b>0.04</b>  | NS           | NS           |
|          | MM52 | <b>0.02</b>                                                         | <b>0.008</b> | <b>0.008</b> | <b>0.03</b>  | <b>0.02</b>  |
| MEK1/2   | MP55 | NS                                                                  | NS           | NS           | NS           | NS           |
|          | MP77 | NS                                                                  | NS           | NS           | <b>0.05</b>  | <b>0.02</b>  |
|          | MM33 | NS                                                                  | NS           | <b>0.04</b>  | NS           | NS           |
|          | MM52 | NS                                                                  | NS           | NS           | <b>0.03</b>  | NS           |
| p-MEK1/2 | MP55 | Too low protein expression levels for relevant statistical analyses |              |              |              |              |
|          | MP77 |                                                                     |              |              |              |              |
|          | MM33 |                                                                     |              |              |              |              |
|          | MM52 |                                                                     |              |              |              |              |
| ERK      | MP55 | NS                                                                  | NS           | <b>0.04</b>  | NS           | NS           |
|          | MP77 | <b>0.03</b>                                                         | NS           | NS           | NS           | NS           |
|          | MM33 | <b>0.02</b>                                                         | <b>0.008</b> | <b>0.03</b>  | NS           | NS           |
|          | MM52 | <b>0.008</b>                                                        | NS           | NS           | NS           | NS           |
| p-ERK    | MP55 | NS                                                                  | NS           | NS           | NS           | NS           |
|          | MP77 | <b>0.02</b>                                                         | <b>0.008</b> | NS           | <b>0.02</b>  | <b>0.008</b> |
|          | MM33 | NS                                                                  | NS           | NS           | NS           | NS           |
|          | MM52 | NS                                                                  | NS           | <b>0.02</b>  | NS           | NS           |
| AKT      | MP55 | NS                                                                  | NS           | NS           | NS           | NS           |
|          | MP77 | NS                                                                  | NS           | NS           | NS           | NS           |
|          | MM33 | <b>0.02</b>                                                         | <b>0.008</b> | <b>0.02</b>  | NS           | NS           |
|          | MM52 | NS                                                                  | NS           | NS           | <b>0.008</b> | NS           |
| p-AKT    | MP55 | NS                                                                  | NS           | NS           | NS           | NS           |
|          | MP77 | NS                                                                  | NS           | NS           | NS           | NS           |
|          | MM33 | NS                                                                  | NS           | NS           | NS           | NS           |
|          | MM52 | NS                                                                  | NS           | NS           | NS           | NS           |
| S6       | MP55 | NS                                                                  | NS           | NS           | NS           | NS           |
|          | MP77 | NS                                                                  | NS           | NS           | NS           | NS           |
|          | MM33 | <b>0.03</b>                                                         | NS           | <b>0.03</b>  | NS           | NS           |
|          | MM52 | NS                                                                  | NS           | NS           | <b>0.008</b> | NS           |
| p-S6     | MP55 | NS                                                                  | NS           | NS           | NS           | NS           |
|          | MP77 | <b>0.01</b>                                                         | NS           | <b>0.01</b>  | <b>0.04</b>  | <b>0.03</b>  |
|          | MM33 | NS                                                                  | NS           | NS           | NS           | NS           |
|          | MM52 | NS                                                                  | NS           | NS           | <b>0.01</b>  | NS           |

**Abbreviations:** C, Control group; O, Olaparib group; D, DTIC group; O + D, Olaparib + DTIC group; NS, not significant.

Significant differences of protein expression between studied groups are indicated in red and bold.

**Table S7: Comparisons of RPPA-based MAPK-related protein expression between *in vivo* experimental groups**

| PDXs     | TGI (%) | Comparisons | MEK1/2 | p-MEK1/2 | ERK   | p-ERK | P38-MAPK | p-p38-MAPK |
|----------|---------|-------------|--------|----------|-------|-------|----------|------------|
| MP55     | 32      | C vs O      | NS     | NS       | NS    | NS    | NS       | NS         |
|          | 35      | C vs D      | NS     | NS       | NS    | NS    | NS       | NS         |
|          | 65      | C vs O + D  | NS     | NS       | NS    | NS    | NS       | NS         |
|          | /       | O vs O + D  | NS     | NS       | NS    | NS    | NS       | NS         |
|          | /       | D vs O + D  | NS     | NS       | NS    | NS    | NS       | NS         |
| MP77 (1) | 19      | C vs O      | NS     | 0.01     | NS    | 0.01  | 0.05     | 0.01       |
|          | 73      | C vs D      | NS     | NS       | NS    | NS    | NS       | NS         |
|          | 96      | C vs O + D  | NS     | 0.006    | 0.02  | NS    | NS       | NS         |
|          | /       | O vs O + D  | NS     | NS       | NS    | 0.002 | NS       | NS         |
|          | /       | D vs O + D  | NS     | NS       | NS    | NS    | NS       | NS         |
| MM33     | 36      | C vs O      | NS     | NS       | NS    | NS    | NS       | NS         |
|          | 17      | C vs D      | 0.04   | 0.05     | NS    | 0.04  | NS       | NS         |
|          | 55      | C vs O + D  | 0.003  | NS       | 0.005 | 0.005 | 0.02     | 0.03       |
|          | /       | O vs O + D  | 0.02   | NS       | NS    | 0.02  | NS       | NS         |
|          | /       | D vs O + D  | NS     | NS       | NS    | NS    | NS       | NS         |
| MM52     | 0       | C vs O      | NS     | NS       | NS    | NS    | NS       | 0.01       |
|          | 51      | C vs D      | NS     | NS       | NS    | NS    | NS       | NS         |
|          | 44      | C vs O + D  | NS     | NS       | NS    | NS    | NS       | NS         |
|          | /       | O vs O + D  | NS     | NS       | NS    | NS    | NS       | NS         |
|          | /       | D vs O + D  | NS     | NS       | NS    | NS    | NS       | NS         |

**Abbreviations:** TGI, Tumor Growth Inhibition; C, Control group; O, Olaparib group; D, DTIC group; O + D, Olaparib + DTIC group; NS, not significant.

Significant differences of protein expression between studied groups are indicated in red.

**Table S8: Comparisons of RPPA-based Pi3K-related protein expression between *in vivo* experimental groups**

| PDXs     | TGI (%) | Comparisons | PTEN  | p-PTEN | PDK1 | p-PDK1 | Akt  | p-Akt <sup>°</sup> | p-Akt <sup>°°</sup> | mTOR | p-mTOR | S6    | p-S6 |
|----------|---------|-------------|-------|--------|------|--------|------|--------------------|---------------------|------|--------|-------|------|
| MP55     | 32      | C vs O      | NS    | NS     | NS   | NS     | NS   | NS                 | NS                  | NS   | NS     | NS    | NS   |
|          | 35      | C vs D      | NS    | NS     | NS   | NS     | NS   | NS                 | NS                  | NS   | NS     | NS    | NS   |
|          | 65      | C vs O + D  | NS    | NS     | NS   | NS     | NS   | NS                 | NS                  | NS   | NS     | NS    | NS   |
|          | /       | O vs O + D  | NS    | NS     | NS   | NS     | NS   | NS                 | 0.05                | 0.04 | NS     | NS    | NS   |
|          | /       | D vs O + D  | NS    | NS     | NS   | NS     | NS   | NS                 | NS                  | NS   | 0.04   | NS    | NS   |
| MP77 (1) | 19      | C vs O      | 0.03  | 0.04   | 0.02 | 0.003  | 0.02 | 0.008              | NS                  | 0.01 | 0.01   | NS    | NS   |
|          | 73      | C vs D      | NS    | NS     | NS   | NS     | NS   | NS                 | NS                  | NS   | NS     | NS    | NS   |
|          | 96      | C vs O + D  | NS    | NS     | NS   | 0.004  | NS   | NS                 | NS                  | 0.04 | 0.02   | NS    | NS   |
|          | /       | O vs O + D  | 0.001 | 0.003  | NS   | NS     | 0.02 | NS                 | NS                  | NS   | NS     | 0.02  | NS   |
|          | /       | D vs O + D  | NS    | NS     | NS   | NS     | NS   | NS                 | NS                  | NS   | NS     | NS    | NS   |
| MM33     | 36      | C vs O      | NS    | NS     | NS   | 0.03   | NS   | NS                 | NS                  | NS   | NS     | NS    | 0.02 |
|          | 17      | C vs D      | NS    | 0.05   | NS   | 0.04   | NS   | NS                 | NS                  | NS   | NS     | NS    | NS   |
|          | 55      | C vs O + D  | 0.02  | 0.02   | 0.04 | 0.05   | 0.02 | NS                 | 0.03                | 0.04 | NS     | 0.02  | 0.02 |
|          | /       | O vs O + D  | 0.04  | 0.04   | NS   | NS     | 0.01 | NS                 | NS                  | 0.03 | NS     | 0.03  | NS   |
|          | /       | D vs O + D  | NS    | NS     | NS   | NS     | NS   | NS                 | NS                  | NS   | NS     | NS    | 0.02 |
| MM52     | 0       | C vs O      | NS    | NS     | NS   | NS     | 0.02 | NS                 | NS                  | NS   | NS     | NS    | NS   |
|          | 51      | C vs D      | NS    | NS     | NS   | NS     | NS   | NS                 | NS                  | NS   | NS     | 0.02  | NS   |
|          | 44      | C vs O + D  | NS    | NS     | NS   | NS     | NS   | NS                 | NS                  | NS   | NS     | 0.001 | NS   |
|          | /       | O vs O + D  | NS    | NS     | NS   | 0.02   | NS   | NS                 | NS                  | NS   | 0.02   | NS    | 0.03 |
|          | /       | D vs O + D  | NS    | NS     | NS   | NS     | NS   | NS                 | NS                  | NS   | NS     | NS    | NS   |

**Abbreviations:** TGI, Tumor Growth Inhibition; C, Control group; O, Olaparib group; D, DTIC group; O + D, Olaparib + DTIC group; NS, not significant.

<sup>°</sup> Phospho-AKT (thr 308); <sup>°°</sup> Phospho-AKT (ser 473).

Significant differences of protein expression between studied groups are indicated in red.

**Table S9: Comparisons of RPPA-based Hippo-related protein expression between *in vivo* experimental groups**

| PDXs     | TGI (%) | Comparisons | Merlin | Mst1-1-STK3-4 | LATS1 | YAP65  | p-YAP65 |
|----------|---------|-------------|--------|---------------|-------|--------|---------|
| MP55     | 32      | C vs O      | NS     | NS            | 0.03  | NS     | NS      |
|          | 35      | C vs D      | NS     | NS            | NS    | NS     | NS      |
|          | 65      | C vs O + D  | NS     | NS            | NS    | NS     | NS      |
|          | /       | O vs O + D  | NS     | NS            | 0.04  | NS     | NS      |
|          | /       | D vs O + D  | NS     | NS            | NS    | NS     | 0.05    |
| MP77 (1) | 19      | C vs O      | 0.01   | 0.02          | 0.02  | 0.02   | 0.0001  |
|          | 73      | C vs D      | NS     | NS            | NS    | NS     | NS      |
|          | 96      | C vs O + D  | 0.02   | 0.03          | NS    | NS     | 0.04    |
|          | /       | O vs O + D  | 0.0002 | 0.003         | 0.002 | 0.0006 | 0.0006  |
|          | /       | D vs O + D  | NS     | 0.02          | NS    | NS     | NS      |
| MM33     | 36      | C vs O      | NS     | NS            | NS    | NS     | NS      |
|          | 17      | C vs D      | NS     | NS            | NS    | NS     | NS      |
|          | 55      | C vs O + D  | 0.01   | 0.003         | 0.01  | NS     | NS      |
|          | /       | O vs O + D  | 0.02   | NS            | 0.03  | NS     | 0.03    |
|          | /       | D vs O + D  | NS     | NS            | NS    | NS     | NS      |
| MM52     | 0       | C vs O      | NS     | NS            | NS    | NS     | NS      |
|          | 51      | C vs D      | NS     | 0.04          | NS    | NS     | 0.001   |
|          | 44      | C vs O + D  | NS     | NS            | NS    | NS     | 0.002   |
|          | /       | O vs O + D  | NS     | NS            | NS    | NS     | 0.009   |
|          | /       | D vs O + D  | NS     | NS            | NS    | NS     | NS      |

**Abbreviations:** TGI, Tumor Growth Inhibition; C, Control group; O, Olaparib group; D, DTIC group; O + D, Olaparib + DTIC group; NS, not significant.

Significant differences of protein expression between studied groups are indicated in red.

**Table S10: Main characteristics of the used uveal melanoma PDXs**

| PDXs  | Histology | Monosomy<br>3 | +8q | <i>GNAQ</i><br>mutation | <i>GNA11</i><br>mutation | <i>BAP1</i><br>mutation | <i>SF3B1</i><br>mutation | BAP1 cell<br>localisation | BAP1 IHC<br>score |
|-------|-----------|---------------|-----|-------------------------|--------------------------|-------------------------|--------------------------|---------------------------|-------------------|
| MP34  | E         | +             | 0   | 0                       | +                        | 0                       | +                        | Nuclear                   | 300               |
| MP41  | E         | 0             | +   | 0                       | +                        | 0                       | 0                        | Nuclear                   | 160               |
| MP42  | S         | 0             | 0   | 0                       | +                        | +                       | 0                        | 0                         | 0                 |
| MP55  | E         | +             | +   | 0                       | +                        | +                       | 0                        | 0                         | 0                 |
| MP77  | E         | 0             | +   | 0                       | +                        | 0                       | 0                        | Nuclear                   | 200               |
| MM26  | E         | +             | +   | +                       | 0                        | 0                       | +                        | Nuclear                   | 200               |
| MM33  | E         | 0             | +   | +                       | 0                        | 0                       | 0                        | Nuclear                   | 200               |
| MM52  | M         | +             | 0   | 0                       | +                        | +                       | +                        | Cytoplasm                 | 20                |
| MM66  | E         | 0             | +   | 0                       | +                        | 0                       | 0                        | Nuclear                   | 300               |
| MM224 | M         | +             | +   | 0                       | +                        | +                       | 0                        | NA                        | NA                |
| MM252 | E         | 0             | +   | +                       | 0                        | 0                       | 0                        | NA                        | NA                |

**Abbreviations:** NA, not available; IHC score, % of tumor cells x intensity (0 to 3).

**Table S11: Compounds tested in *in vivo* experiments**

| Compounds          | Route | Dose per administration (mg/kg) | Days of treatment       |
|--------------------|-------|---------------------------------|-------------------------|
| <b>AEB071</b>      | PO    | 240                             | BID, 5 days/week        |
| <b>AZD0156</b>     | PO    | 2.5 or 5                        | 3 days/week             |
| <b>AZD6738</b>     | PO    | 12.5                            | 3 days/week             |
| <b>CGM097</b>      | PO    | 100                             | 5 days/week             |
| <b>Dacarbazine</b> | IP    | 40                              | Days 1-5, every 4 weeks |
| <b>Everolimus</b>  | PO    | 5                               | 5 days/week             |
| <b>Fotemustine</b> | IP    | 20                              | Days 1 and 22           |
| <b>Olaparib</b>    | PO    | 50 or 100                       | 5 days/week             |

**Abbreviations:** PO, per os; IP; intraperitoneal administration.

**Table S12: List of the proteins studied by RPPA between patient's tumors and corresponding PDXs**

| ANTIBODY                                     | SPECIES | SUPPLIER   | REFERENCE           |
|----------------------------------------------|---------|------------|---------------------|
| Phospho-Histone H2AX (ser139)                | R       | Abcam      | ab2893              |
| Histone H2AX                                 | R       | CST        | 2595                |
| Mre11 (31H4)                                 | R       | CST        | 4847                |
| Phospho-DNA-PK (Ser2612)                     | R       | Epitomics  | 2355-1              |
| Hsp90 alpha                                  | R       | Abcam      | ab2928              |
| Phospho-Topoisomerase II a (Thr1343)         | R       | Epitomics  | 1871-1 /<br>ab52853 |
| ATM                                          | R       | Epitomics  | 1549-1              |
| ERCC1                                        | R       | CST        | 3885                |
| Cleaved PARP (Asp214) p25                    | R       | Epitomics  | 1051-1              |
| Phospho-ATM (ser1981)                        | R       | Novus      | NB110-55475         |
| MSH2 (D24B5)                                 | R       | CST        | 2017                |
| 53BP1                                        | R       | CST        | 4937                |
| Rad50                                        | R       | CST        | 3427                |
| MDM2 [EP16627]                               | R       | Abcam      | ab178938            |
| Phospho-S6 Ribosomal Protein<br>(Ser240/244) | R       | CST        | 2215                |
| YAP65                                        | R       | Epitomics  | 2060-1              |
| Phospho-S6 Ribosomal Protein<br>(Ser235/236) | R       | CST        | 2211                |
| Akt (pan) (C67E7)                            | R       | CST        | #4691               |
| Akt                                          | R       | CST        | 9272                |
| Phospho-Akt (Thr308) (D25E6)                 | R       | CST        | 13038               |
| PTEN (D4.3) XP                               | R       | CST        | 9188S               |
| phospho-mTOR (Ser2448)                       | R       | Abcam      | ab109268            |
| Phospho-PTEN (ser380/Thr382/383)             | R       | CST        | 9554                |
| Bcl2                                         | R       | CST        | 2876                |
| Bak                                          | R       | Epitomics  | 1542-1              |
| mTOR                                         | R       | Abcam      | ab51089             |
| Mst1/2 / STK3/4                              | R       | Bethyl     | A300-468A           |
| Bcl-xL                                       | R       | Epitomics  | 1018-1              |
| Mcl-1                                        | R       | Santa-Cruz | SC-819              |
| Phospho-YAP65 (Ser127)                       | R       | CST        | 4911S               |
| PARP uncleaved p116                          | R       | Epitomics  | 1077-1 /<br>ab32378 |
| Bax (D2E11)                                  | R       | CST        | #5023               |
| Phospho-PDK1 (Ser241)                        | R       | CST        | 3061                |
| PDK1 (D37A7)                                 | R       | CST        | 5662                |
| Phospho-Akt (Ser473) (193H12)                | R       | CST        | 4058                |

|                                                           |   |                     |              |
|-----------------------------------------------------------|---|---------------------|--------------|
| NBS1 p95                                                  | R | CST                 | 3002         |
| Merlin                                                    | R | Epitomics           | 3357-1       |
| Ape1                                                      | R | CST                 | 4128         |
| p38 MAPK                                                  | R | Epitomics           | 1544-1       |
| Topoisomerase II alpha                                    | R | Epitomics           | 1826-1       |
| Phospho-53BP1 (Ser1778)                                   | R | CST                 | 2675         |
| Phospho-MEK1/2 (Ser217/221)                               | R | CST                 | 9154         |
| Phospho-Estrogen Receptor alpha (Ser118)                  | R | Epitomics           | 1091-1       |
| p53                                                       | R | CST                 | 9282         |
| Ezrin                                                     | R | Epitomics           | 2255-1       |
| LATS1                                                     | R | Bethyl              | A300-478A    |
| MEK1/2                                                    | R | CST                 | 9122S        |
| Phospho-Chk2 (Thr68)                                      | R | CST                 | 2197         |
| Phospho-p38 MAPK (Thr180/Tyr182)                          | R | CST                 | 4631         |
| Phospho-p44/42 MAPK (Thr202/Tyr204)                       | R | CST                 | 4377 (197G2) |
| Estrogen receptor alpha (D8H8)                            | R | CST                 | 8644         |
| p44/42 MAPK                                               | R | CST                 | 9102         |
| Phospho-Chk1 (Ser280)                                     | R | CST                 | 2347         |
| Phospho-Ezrin (Thr567) / Radixin (Thr564)/Moesin (Thr558) | R | CST                 | 3141         |
| Phospho-FANCD2 (Ser222)                                   | R | CST                 | 4945         |
| S6 Ribosomal Protein (5G10)                               | R | CST                 | 2217         |
| FANCD2                                                    | R | Epitomics           | 2986-1       |
| Histone H3 trimethylated K9 (H3K9me3)                     | R | Upstate (Millipore) | 07-442       |
| Phospho-p53 (Ser15)                                       | R | CST                 | 9284         |
| SUV39H1                                                   | R | CST                 | 8729         |
| Rad51 (D4B10)                                             | R | CST                 | 8875         |
| Progesterone receptor                                     | R | Epitomics           | 1483-1       |
| Ku80 (C48E7)                                              | R | CST                 | 2180         |
| Phospho-Progesterone Receptor (Ser190)                    | R | Epitomics           | 2258-1       |

**Table S13: List of the proteins studied by Western Blots and their corresponding used antibodies**

| Signaling pathway / function | Protein               | Reference of the antibody        |
|------------------------------|-----------------------|----------------------------------|
| Control                      | GAPDH                 | Cell Signaling Technology, #2118 |
| PARP and apoptosis           | PARP                  | Abcam, # ab32378                 |
|                              | Cleaved PARP          | Cell Signaling Technology, #9541 |
|                              | Histone H3            | Cell Signaling Technology, #9717 |
|                              | p-Histone H3          | Abcam, # ab32107                 |
| MAPK                         | MEK1/2                | Cell Signaling Technology, #9126 |
|                              | p-MEK1/2 (ser217/221) | Cell Signaling Technology, #9154 |
|                              | ERK                   | Cell Signaling Technology, #9102 |
|                              | p-ERK (Thr202/Tyr204) | Cell Signaling Technology, #4370 |
| Pi3K                         | AKT                   | Cell Signaling Technology, #9272 |
|                              | p-AKT (ser473)        | Cell Signaling Technology, #4058 |
|                              | S6                    | Cell Signaling Technology, #2117 |
|                              | p-S6 (Ser235/236)     | Cell Signaling Technology, #2211 |

**Table S14: List of the proteins studied by IHC and their corresponding used antibodies**

| <b>Proteins</b>          | <b>Origin</b>  | <b>Clone</b> | <b>pH</b> | <b>Concentration</b> | <b>Time of incubation</b> |
|--------------------------|----------------|--------------|-----------|----------------------|---------------------------|
| <b>AKT</b>               | Santa Cruz     | sc-8312      | pH6       | 1/100e               | 1 hour                    |
| <b>Caspase 3</b>         | Abcam          | ab4051       | pH6       | 1/50e                | 1 hour                    |
| <b>Cleaved PARP</b>      | Abcam          | ab32064      | pH6       | 1/100e               | 1 hour                    |
| <b>Cleaved-caspase 3</b> | Cell signaling | #9661        | pH6       | 1/250e               | 1 hour                    |
| <b>ERK</b>               | Abcam          | ab32537      | pH6       | 1/200e               | 1 hour                    |
| <b>ki67</b>              | Dako           | F7268        | pH9       | 1/100e               | 1 hour                    |
| <b>MEK1/2</b>            | Abcam          | ab32091      | pH9       | 1/75e                | 1 hour                    |
| <b>P-AKT</b>             | Cell signaling | #9277        | pH9       | 1/50e                | Overnight (4°C)           |
| <b>PARP</b>              | Abcam          | ab32138      | pH6       | 1/150e               | 1 hour                    |
| <b>p-ERK</b>             | Abcam          | ab194770     | pH9       | 1/250e               | 1 hour                    |
| <b>p-H2AX</b>            | Cell signaling | #9718        | pH9       | 1/100e               | 1 hour                    |
| <b>p-MEK1/2</b>          | Abcam          | ab96379      | pH9       | 1/600e               | 1 hour                    |
| <b>p-S6</b>              | Cell signaling | #4858        | pH6       | 1/100e               | 1 hour                    |
| <b>S6</b>                | Abcam          | ab40820      | pH6       | 1/300e               | 1 hour                    |
| <b>TAZ</b>               | Abcam          | ab110239     | pH6       | 1/350e               | 1 hour                    |
| <b>YAP</b>               | Protein tech   | 13584-1-AP   | pH6       | 1/2000e              | 1 hour                    |
